Functional metagenomics using *Pseudomonas putida* expands the known diversity of polyhydroxyalkanoate synthases and enables the production of novel polyhydroxyalkanoate copolymers

Jiujun Cheng and Trevor C. Charles\*

Department of Biology and Centre for Bioengineering and Biotechnology, University of Waterloo, Waterloo, Ontario, Canada N2L 3G1

\*Corresponding author:

Dr. Trevor C. Charles

Department of Biology, University of Waterloo, Waterloo, Ontario, Canada N2L 3G1.

E-mail: [tcharles@uwaterloo.ca](mailto:tcharles@uwaterloo.ca)

## Abstract

Bacterially produced biodegradable polyhydroxyalkanoates with versatile properties can be achieved using different PHA synthase enzymes. This work aims to expand the diversity of known PHA synthases via functional metagenomics, and demonstrates the use of these novel enzymes in PHA production. Complementation of a PHA synthesis deficient *Pseudomonas putida* strain with a soil metagenomic cosmid library retrieved 27 clones expressing either Class I, Class II or unclassified PHA synthases, and many did not have close sequence matches to known PHA synthases. The composition of PHA produced by these clones was dependent on both the supplied growth substrates and the nature of the PHA synthase, with various combinations of SCL- and MCL-PHA. These data demonstrate the ability to isolate diverse genes for PHA synthesis by functional metagenomics, and their use for the production of a variety of PHA polymer and copolymer mixtures.

## Keywords:

Functional metagenomics; soil metagenomic library; polyhydroxyalkanoate (PHA); bioplastics; polyhydroxyalkanoate synthase; *Pseudomonas putida*; *Sinorhizobium meliloti*

## Introduction

Polyhydroxyalkanoates (PHAs) are natural polyesters biosynthesized by a variety of bacteria under unbalanced growth conditions. They serve as reserves of carbon and reducing power and aid in survival during starvation or stress conditions (Verlinden et al. 2007). These biodegradable and environmentally friendly polymers can be used as alternative materials to conventional petrochemical-based plastics. PHAs are classified into short-chain-length (SCL, C3-C5) and medium-chain-length (MCL,  $\geq$ C6), and copolymers (SCL + MCL) based on the number of carbon atoms per monomer. MCL-PHA is generally more useful than SCL-PHA due to it being less brittle and more flexible. To produce PHA with versatile properties cost-effectively, strategies have involved mining new PHA synthase enzymes (PhaC), engineering PhaC proteins and modifying the metabolic pathways of the production strains (Keshavarz and Roy 2010; Schallmeyer et al. 2011; Cheema et al. 2012; Park et al. 2012; Tripathi et al. 2013; Meng et al. 2014).

PHA molecules consist of over 150 possible constituent monomers of hydroxyl fatty acids (Meng et al. 2014) (Steinbüchel and Lütke-Eversloh 2003). PHA synthase enzymes catalyze the joining of the hydroxyl group of one monomer with the carboxyl group of another by an ester bond to form PHA polymers. The monomeric composition of PHA is determined primarily by PhaC, although the available carbon source and metabolic pathways also influence the properties of PHA (Verlinden et al. 2007). PhaC proteins are grouped into four classes based on amino acid sequence, substrate specificity and subunit composition (Rehm 2003). Class I and II PhaC consist of one subunit (PhaC), but those in Class III and IV are composed of two subunits (PhaC+PhaE and PhaC+PhaR, respectively). Class I and IV PhaCs synthesize SCL-PHA whereas Class II polymerize MCL-PHA. Class III PhaCs can synthesize both SCL and MCL monomers.

The key Class I PHA synthesis pathway genes include *phaC* (or *phbC*), *phaA* (or *phbA*) and *phaB* (or *phbB*). The three genes are often, but not always, clustered in a single operon. The acetoacetyl-CoA reductase (EC 2.3.1.9) encoded by the *phaA* and  $\beta$ -ketothiolase (EC 1.1.1.36) encoded by the *phaB* convert acetyl-CoA to (R)-3-hydroxybutyryl-CoA (3HB-CoA) through acetoacetyl-CoA. The Class-I PhaC (EC 2.3.1.-) then polymerizes 3HB-CoA into polyhydroxybutyrate (PHB) (Rehm 2003). The Class II *pha* cluster is well conserved in *Pseudomonas* and consists of two PHA synthase genes (*phaC1* and *phaC2*) flanking a PHA depolymerase gene (*phaZ*), and *phaD* encoding a transcriptional activator of *pha* genes. Phasin-encoding *phaF* and *phaI* gene are transcribed divergently to other *pha* genes. MCL monomers ((R)-3-hydroxylacyl-CoA) are derived from  $\beta$ -oxidation of fatty acids or fatty acid *de novo* synthesis from unrelated carbon sources (Tortajada et al. 2013).

Traditional culture-based strategies for obtaining new biocatalysts are limited by the inability to cultivate the majority of environmental microbes. While sequence-based metagenomics can identify genes homologous to those present in available sequence databases, it is difficult to reliably predict the function of truly new genes through homology-based analysis. In contrast, functional metagenomics involves the construction of gene libraries from microbial community genomic DNA and functional screening for novel enzymes of interest or potential industrial applications (Simon and Daniel 2011). Functional metagenomics has the potential to identify truly novel sequences for a given function.

In previous work, functional metagenomics was used to isolate new Class I PhaC from soil metagenomic clones by Nile red staining and phenotypic screening in  *$\alpha$ -Proteobacteria* *Sinorhizobium meliloti* (Schallmeyer et al. 2011). In another study, *phaC* genes encoding both Class I and II PhaC proteins were PCR amplified from oil-contaminated soil library clones (Cheema et al.

2012). One of the isolated genes produced PHA copolymer when expressed in *Pseudomonas putida*. Moreover, partial *phaC* genes were also obtained from metagenomic DNA via direct PCR amplification (Foong et al. 2014; Pärnänen et al. 2015; Tai et al. 2015). Building on these previous studies, we constructed a PHA<sup>-</sup> strain of *P. putida* KT2440 to use as a surrogate host and functionally identified *phaC* genes after screening millions of agricultural wheat soil metagenomic clones. A total of 27 PHA<sup>+</sup> clones were obtained. Accumulation and monomer composition of PHA directed by seven of these clones were further examined.

## Methods

### Bacterial strains, plasmids, cosmids and growth conditions

Bacterial strains, plasmids and cosmids are listed in Table 1. *E. coli* strains were grown at 37°C in LB (Lennox) medium (1% tryptone (w/v), 0.5% yeast extract (w/v), and 0.5% NaCl (w/v), pH 7). *Pseudomonas* strains were grown at 30°C in LB or 0.1N M63 minimal medium (Escapa et al. 2011) supplemented with 0.5% sodium octanoate (w/v), 0.5% nonanoic acid (v/v) or 1% gluconic acid (w/v). *S. meliloti* was grown in LB or YM medium (Schallmeyer et al. 2011). Antibiotics were used at the following concentrations: streptomycin, 200 µg/ml for *S. meliloti* and 100 µg/ml for *E. coli*; kanamycin, 100 µg/ml for *Pseudomonas* and 50 µg/ml for *E. coli*; neomycin, 200 µg/ml; rifampicin, 100 µg/ml; gentamicin, 10 µg/ml for *E. coli* and 100 for *P. putida*; and tetracycline 20 µg/ml for *E. coli* or 40 µg/ml for *P. putida*.

### Construction of PHA<sup>-</sup> strain PpUW2

DNA oligonucleotides are listed in Table 2. A Rif<sup>R</sup> spontaneous mutant PpUW1 of *P. putida* KT2440 was generated by plating a culture of strain KT2440 on a LB Rif plate, followed by single

colony purification. To construct the PHA deficient strain PpUW2 (*phaCIZC2*) of *P. putida* PpUW1, a 943-bp DNA fragment containing 5′-*phaC1* region (766 bp) was PCR amplified using *P. putida* KT2440 genomic DNA as a template and primer pair JC161-JC162, digested with HindIII-BamHI and then cloned into the same sites in pJQ200-SK (Quandt and Hynes 1993), yielding plasmid pJC63. Another 876-bp DNA fragment containing the 3′-*phaC2* gene (120 bp) was PCR amplified using primers JC163-JC164, digested with BamHI-SalI and then cloned into the same sites in pJC63 to obtain plasmid pJC69. An omega-Km cassette was obtained from pHP45Ω-Km (Fellay et al. 1987) by BamHI digestion and then inserted into the same site in pJC69 to obtain pJC71. Plasmid pJC71 was then conjugated into *P. putida* PpUW1 in a triparental mating using helper plasmid pRK600. Single cross-over recombination of pJC71 into the *P. putida* chromosome was selected with Rif and Gm. A double cross-over event was achieved by growing a single Rif<sup>R</sup> Gm<sup>R</sup> colony overnight in LB, making serial dilutions and then spreading on LB Km with 5% sucrose. The resulting PHA<sup>-</sup> strain PpUW2 was verified by examining Gm sensitivity (lost plasmid backbone) and absence of PHA production in LB supplemented with 0.5% octanoate (w/v), and was further confirmed by PCR amplification analysis.

## **Phenotypic screening for *phaC* genes from metagenomic library clones**

Construction of the metagenomic DNA library (11AW) of agricultural wheat soil was described previously (Cheng et al. 2014). The 11AW library contains  $9 \times 10^6$  clones hosted in *E. coli* HB101. The pooled library clones (0.5 ml of 300 ml stock) were conjugated *en masse* into *P. putida* PpUW2 (PHA<sup>-</sup>) with the helper plasmid pRK600. Mating mixture was diluted serially with 0.85% NaCl and ~20,000 transconjugants recovered on each LB Tc plate (15 mm × 150 mm) supplemented with 0.5% Na octanoate (w/v). The plates were incubated at 30°C for 24 h and then kept at 22°C for

2-6 days. Potential PHA<sup>+</sup> clones of opaque white colour were streak purified on the LB octanoate plates, and verified on 0.1N M63 minimal medium plates (Escapa et al. 2011) supplemented with 0.5% octanoate (w/v) and Nile red (0.5 µg/ml). PHA<sup>+</sup> cosmids were transferred from *P. putida* to *E. coli* DH5α(Rif<sup>R</sup>), mobilized by pRK600. The cosmid DNA was isolated from *E. coli* strains using a GeneJET Plasmid Miniprep Kit (Thermo Scientific), digested by EcoRI-HindIII-BamHI (Thermo Scientific), and then resolved on 1% TAE agarose gels. Cosmids with distinct electrophoretic patterns were conjugated back to *P. putida* PpUW2 (PHA<sup>-</sup>) to confirm their PHA<sup>+</sup> phenotype.

### **Complementation of *S. meliloti* (*phbC*)**

11AW cosmid DNA encoding Class I and II *phaC* genes was introduced into *S. meliloti* Rm11476 (Schallmeyer et al. 2011) via triparental conjugation. Transconjugants were selected on LB SmNmTc plates, and then streaked on YM plates containing Nile red (Schallmeyer et al. 2011) for visualizing PHB production.

### **DNA sequencing and bioinformatics**

KOD Xtreme DNA polymerase (Novagen) was used for all PCR. Primers are listed in Table 2. PCR reactions consisted of one cycle of 94°C for 5 min, 30 cycles of 94°C for 30 s, 53°C for 30 s and 68°C for 30 s, and final extension at 68°C for 10 min. The internal regions of *phaC* genes were PCR amplified from PHA<sup>+</sup> cosmids using primer phaCF1 and phaCR4 (Sheu et al. 2000). When no PCR product of correct size was obtained, a semi-nested PCR was performed with the primers phaCF2 and phaCR4 as described previously (Sheu et al. 2000). PCR products were resolved on 2% agarose gels, isolated from the gels using EZ-10 Spin Column DNA Gel Extraction Kit (Bio Basic),

and then cloned into pJET1.2 vector (Thermo Scientific). Sequences of the cloned partial *phaC* genes were obtained using pJET1.2 sequencing primers (Table 2).

End sequences of PHA<sup>+</sup> cosmid DNA were obtained by Sanger sequencing using universal M13F and M13R primers. For high throughput sequencing, 68 cosmids of 11AW PHA<sup>+</sup> clones and 28 cosmids from other research projects were grouped into 24 pools. Tagmentation of pooled cosmid DNA, PCR amplification and clean-up, and library normalization were performed with the Nextera XT DNA library and index kits (Illumina), according to the supplier's recommendation. The library was sequenced using MiSeq 500-cycle version 2 reagent (Illumina). DNA sequences were assembled using SPAdes Genome Assembler 3.5.0 (BaseSpace, Illumina). Cosmid clones were identified based on the available Sanger end sequences (Lam et al. 2014) and ORFs were annotated with MetaGeneMark (Zhu et al. 2010). Predicted protein sequences were analyzed by BLAST against the non-redundant protein databases (NCBI). Multiple-sequence alignment was performed using MUSCLE (Edgar 2004). Phylogenetic analysis was performed using MEGA6 (Tamura et al. 2013). Origin of cloned metagenomic DNA was predicted by PhyloPythia (Patil et al. 2012).

#### **Cloning of *phaCI<sub>Pp</sub>* gene of *P. putida* KT2440**

To construct a *phaC* expression cosmid for a positive control, the *phaCI<sub>Pp</sub>* gene (*Pp\_5003*) of *P. putida* KT2440 was PCR amplified using primers JC159-JC160 and cloned into the HindIII and BamHI sites in the broad-host-range vector pRK7813 (Cheng et al. 2014), to obtain construct pJC67 (*Plac::phaCI<sub>Pp</sub>*). A stop codon (TGA) for terminating the translation of *lacZα* upstream of the *phaCI<sub>Pp</sub>*, and a ribosome-binding site (AGGAG) were incorporated into the primer JC159 (Table 2).

#### **Subcloning *phaC* genes of 11AW metagenomic clone 16**



The Class II *phaC1*<sub>16</sub> gene of 11AW clone 16 was PCR amplified with oligos JC301 and JC302, and cloned into the HindIII-EcoRI sites in pRK7813 to obtain pJC123. The *phaC2*<sub>16</sub> was amplified using primers JC337 and JC334, and inserted into the EcoRI site in pJC123, yielding pJC157. The orientation of cloned *phaC2*<sub>16</sub> was verified by restriction enzyme mapping. The *phaC2*<sub>16</sub> gene was also obtained by PCR using oligos JC333 and JC334, and cloned into the HindIII-EcoRI sites in pRK7813 to yield pJC159. A stop codon (TGA) for terminating the translation of *lacZα* gene and ribosome-binding sites were added in primers JC333 and JC337. The cloned *phaC* genes were verified by DNA sequencing.

### **Estimation of PHA production by fluorescent spectrometry**

A modification of the previously described method (Wu et al. 2003) was used. *S. meliloti* cells (2.5%, v/v) were added to YM medium. All cultures were incubated at 30°C and 200 rpm for 48-72 h. The OD<sub>600</sub> values of 200 µl cultures were measured in 96-well microtiter plates with the Multiskan Spectrum spectrophotometer (Thermo Labsystems). Samples (180 µl) were stained with 20 µl of Nile red (2.5 µg/ml) in the dark for 1 h. Fluorescent intensity was measured at excitation (485 nm) and emission (595 nm) with the FilterMax F5 Multi-mode microplate reader (Molecular Devices). PHA content was calculated based on the equation (fluorescent intensity/OD<sub>600</sub>×0.9).

### **PHA production, extraction and characterization**

*P. putida* PpUW1 (PHA<sup>+</sup>) or PpUW2 (PHA<sup>-</sup>) carrying PHA<sup>+</sup> clones were grown overnight in LB with or without Tc, washed once with 0.85% NaCl, and then subcultured (2%, v/v) in the 0.1N M63 medium with or without Tc, supplemented with 0.5% Na octanoate, 0.5% nonanoic acid or 1% gluconic acid. The cultures were grown at 30°C and at 200 rpm for 48 hrs. Cells were collected by

centrifugation at 20°C and at 9000 × g for 15 min, washed once with deionized water. Cell dry weight (CDW) was obtained after drying the cells at 95°C for 24 hr. For PHA methanolysis, cell pellet (~15 mg) was suspended in 2 ml of chloroform and 2 ml of methanol with 15% H<sub>2</sub>SO<sub>4</sub> (v/v), and incubated at 100°C for 5 h. After the reaction mixture was cooled down to 20°C, 1 ml of deionized water was added, and vortexed vigorously for 1 min. The chloroform phase was passed through a cotton plug in a Pasteur glass pipette to remove any cell debris. Methanolized sample (1 µl) was analyzed with GC-MS (an Agilent 7975B GC equipped with Agilent 5975B inert XL EI/CI MSD and an HP-5MS capillary column). Oven temperature was run at initial 50°C for 5 min with a ramp of 20°C/min to 280°C, and then held for 10 min. The flow rate of Helium carrier gas was 1.2 ml/min. Methylated PHA monomers were identified using the Agilent enhanced MSD chemstation (E.02.01.117). PHA standards were kindly provided by Dr. Bruce A. Ramsay (Polyferm Canada).

## Results

### Isolation of metagenomic clones for PHA production

To employ *P. putida* as a surrogate host to isolate 11AW (agricultural wheat soil) metagenomic library clones encoding functional PhaC, it was first necessary to construct a PHA synthesis mutant. Expression of the contiguous three genes encoding PHA synthase PhaC1<sub>Pp</sub> (Pp\_5003), PHA depolymerase PhaZ<sub>Pp</sub> (Pp\_5004) and PHA synthase PhaC2<sub>Pp</sub> (Pp\_5005) in *P. putida* KT2440 Rif<sup>R</sup> derivative PpUW1 was disrupted by deletion of 3437-bp comprised of the 3' region (911 bp) of *phaC1<sub>Pp</sub>* (1677 bp), *phaZ<sub>Pp</sub>* and the 5' region (1560 bp) of *phaC2<sub>Pp</sub>* (1680 bp) and replacement with an omega-Km kanamycin resistance insert, resulting in the PHA<sup>-</sup> strain PpUW2. Transfer of the negative control cosmid vector pJC8 to *P. putida* PpUW2 did not result in detectable PHA production. However, introduction of pJC67 (*Plac::phaC1<sub>Pp</sub>*) *in trans* restored the PHA<sup>+</sup>

phenotype (Fig. 1). These data suggested that the strain PpUW2 could be used for screening of PhaC-encoding metagenomic clones. The 11AW library clones (Cheng et al. 2014) were transferred to *P. putida* PpUW2 via en masse triparental conjugation. Following selection of *P. putida* PpUW2 transconjugants (~4 million) on LB Km Tc plates supplemented with 0.5% Na octanoate, we obtained 72 clones that exhibited greater opacity than the PpUW2 PHA<sup>-</sup> recipient strain. The PHA-producing phenotype of those clones was verified by visualizing the fluorescence of Nile red-stained PHA in 0.1N M63 minimal medium (Escapa et al. 2011) supplemented with Na octanoate as the sole carbon source (Fig. 1). Restriction digest of DNA from the 72 clones demonstrated 68 distinct restriction patterns, suggesting the presence of a broad diversity of DNA origin in those PHA<sup>+</sup> clones.

## Identification of *phaC* genes encoding PHA synthases

Internal regions (~500 bp) of the *phaC* genes of 18 distinct cosmid clones were initially obtained by PCR amplification using degenerate primers PhaCF1 and PhaCR4 (Sheu et al. 2000). For additional 4 clones, *phaC* fragments (PhaC<sub>3</sub>, PhaC<sub>7</sub>, PhaC<sub>10</sub>, and PhaC<sub>15</sub>) of ~400 bp were generated by nested-PCR using primer pair PhaCF2-PhaCR4 as described previously (Sheu et al. 2000). BLASTP analysis of the cloned gene products indicated that 13 PhaC proteins could be grouped into Class I while the other 9 were categorized as Class II PHA synthases.

To identify all *pha* genes on the isolated clones, DNA sequences were obtained by high throughput sequencing, and additional *pha* gene loci were identified in partially and fully assembled clones (Table 3; Supplementary 1). The identified PHA synthases could be classified into 3 groups based on amino acid sequences (Fig. 2). Class I *phaC* genes were annotated in 17 clones. The *phaC* and *phaAB* genes were adjacently located in 12 of these clones, whereas the *phaB* gene was located distantly downstream of *phaCA* genes in clone 25 and clone P1N3 (Supplementary 1). A *phaR* gene

was located immediately downstream of *phaCB* genes in partially assembled clone P11N2. The *phaC* and *phaB* genes flanked a *phaZ* gene in the partially assembled clone P2N8. The metagenomic DNA in these Class I clones was predicted to originate from *Gemmatimonas*,  $\alpha$ -*Proteobacteria* (*Sphingomonadaceae*),  $\beta$ -*Proteobacteria* (*Leptothrix*, *Rubrivivax*, *Janthinobacterium*) and  $\gamma$ -*Proteobacteria* (*Xanthomonadaceae*) (Table 3).

Class II PHA genes are commonly clustered with *phaZ* flanked by two PHA synthase encoding genes, *phaC1* and *phaC2*. Nine clones carried Class II *phaC* genes (Table 3). The *pha* gene locus (*phaC1<sub>1</sub>*-*phaZ*-*phaC2<sub>1</sub>*-*phaD*-*phaF*-*phaI*) in clone 1 was similar to the canonical locus in *Pseudomonas* including *P. putida* KT2440 (de Eugenio et al. 2010), except the presence of *orf7* encoding a PHA granule associated protein (Pfam09650) (Fig. 3A). Clone 2 and clone 15 were identical to the clone 1, except that they contained an insertion of the 17,013-bp transposon Tn4652 at 13,740 nt and 16,362 nt respectively (Supplementary 2). The Tn4652 duplicated target sequences were AACTC in clone 2 and TAGGA in clone 15. The transposon insertions in these clones are in opposite orientation. The same Tn4652 is present in *P. putida* KT2440 genome (3,366,550 - 3,383,562 nt, GenBank: AE015451), located distant from the *pha* gene operon. These insertions likely occurred following introduction of the cosmid clones into *P. putida*.

Class II clones 5, 16, 20 and 50 had no genes encoding *phaD* or *phaFI* homologs. A *phaJ* gene encoding R-specific enoyl-CoA hydratase was identified in those clones (Fig. 3A; Supplementary 1). The *phaJ* gene was located immediately upstream of the *phaC* genes in clones 16, 20 and 50, but downstream of *phaC* in clone 5. In addition, a gene encoding PHA depolymerase (PhaZ) was located downstream of the *phaC* genes in clones 16, 20 and 50. ORFs downstream of the *phaZ* genes in clones 16 and 50 encoded proteins (PhaC2<sub>16</sub> and PhaC2<sub>50</sub>) homologous to unclassified

PHA synthases (Fig. 2; Supplementary 1). The proteins shared conserved regions in PhaC enzymes, but were ~30% shorter in N-terminal regions than in those of Class I/II PhaC (Supplementary 2).

Two ORFs encoding putative PhaC and PhaE proteins were identified in partially assembled clone P2N10 (Table 3; Supplementary 1). BLASTP showed the P2N10 PhaC protein best matched to the Class III PhaC [GenBank: WP\_002708071] (43% identity) from *γ-Proteobacteria Thiothrix nivea* (Table 3). The available C-terminal sequence of P2N10 PhaE (234 amino acids) only exhibited 26% identity to the Class III PhaE [GenBank: WP\_002708072] of *T. nivea*. In addition, the P2N10 PhaC protein was only 29% identical to the Class IV PhaC [GenBank: AAD05620] of *Bacillus megaterium*. Phylogenetic analysis suggested that P2N10 PHA synthase was distant from Class III/IV PhaC and might represent a new subclass of PHA synthases (Fig. 2).

Multiple alignment of amino acid sequences of each of the identified 11AW PhaC proteins showed the conserved catalytic triad (C287, D445 and H473 in PhaC<sub>16</sub>), a tryptophan essential for dimerization (W391 in PhaC<sub>16</sub>), and the lipase box GXCXGG (Jia et al. 2000) except that Ala replaced the first Gly residue in PhaC<sub>20</sub> and second Gly in clone P8N7 (Fig. 3B; Supplementary 3). The serine residue (S229 in PhaC<sub>16</sub>) required for PhaC activity (Hoppensack et al. 1999) was also conserved in all 11AW PhaC proteins. We chose the PhaC proteins in the Class I clones 14, 18 and 25, and the Class II clones 1, 16 and 20, for further study. We examined the nature of PHA produced using different carbon sources that result in substrate production either through fatty acid synthesis or  $\beta$ -oxidation.

### **Class II clone 1 synthesizes MCL PHA**

The cloned metagenomic DNA in clone 1 contained 42,747 bp (Table 3) [GenBank: KT944254] and most likely originated from *γ-Proteobacteria Pseudomonas*. The PhaC<sub>1</sub>, PhaZ,

PhaC<sub>2</sub><sub>1</sub> and PhaD proteins [GenBank: ALV86243, ALV86281, ALV86274 and ALV86275] were 82%, 92%, 73% and 78% identical to the corresponding orthologs (PhaC<sub>1</sub>, PhaZ, PhaC<sub>2</sub> and PhaD) of *P. putida* KT2440. Clone 1 PhaC<sub>2</sub><sub>1</sub> was phylogenetically related to the PHA synthase 2 [GenBank: BAA36202] of *Pseudomonas* sp. 61-3 (Fig. 2). In contrast to other Class II PhaC, the conserved amino acid at position 129 of PhaC<sub>2</sub><sub>1</sub> was Asp rather than Glu (Fig. 3B). It has been previously demonstrated that substitution of the conserved Glu with Asp in Class II PhaC improves PHA yield with an increase of 3-hydroxybutyrate monomer (Matsumoto et al. 2005).

PHA synthesis in clone 1 was likely contributed solely by PhaC<sub>2</sub><sub>1</sub> because the 5'-region of *phaC*<sub>1</sub><sub>1</sub> was absent in the cloned DNA. Expression of the functional *phaZ* and *phaC*<sub>2</sub><sub>1</sub> might be driven by the promoters upstream of the individual genes, as occurs in *P. putida* KT2440 (de Eugenio et al. 2010). *P. putida* PpUW2 (PHA<sup>-</sup>) carrying clone 1 synthesized 3-hydroxyhexanoate (3HHx, C6) and 3-hydroxyoctanoate (3HO, C8) copolymer of ~95% C8 monomer when grown with octanoate, similar to the PHA produced by wild-type *P. putida* PpUW1 (Table 4). When PpUW2 (clone 1) was grown with nonanoic acid, 3-hydroxynonanoate (3HN, C9) and 3-hydroxyheptanoate (3HP, C7) were incorporated into the PHA with greater 3HP than that synthesized by wild type PpUW1 (Table 4). These data suggest that those monomers were derived from  $\beta$ -oxidation of octanoate and nonanoic acid.

When gluconic acid was used as the sole carbon source, 3HO and 3-hydroxydecanoate (3HD, C10) copolymer was produced in PpUW2 (PHA<sup>-</sup>) carrying clone 1, very similar to the production of the parental strain PpUW1 (PHA<sup>+</sup>) (Table 4). The monomer composition of PHA was similar in both strains, but total PHA accumulation was ~4 fold higher in gluconic acid-grown PpUW2 with clone 1 (Table 4). These results suggest that Class II PhaC<sub>1</sub><sub>2</sub> was able to synthesize MCL (C6-C10) PHA.

## Class II clone 16 synthesizes SCL-MCL copolymer

Clone 16 contains 33,900-bp metagenomic DNA [GenBank: KT944263] probably originated from *β-Proteobacteria Methylibium* (Table 3). A *phaJ* gene (*phaJ*<sub>16</sub>) is predicted to encode a R-specific enoyl-CoA hydratase [GenBank: ALV86416] (Fig. 3A), which converts the β-oxidation intermediate 2-enoyl-CoA to (R)-3-hydroxyacyl-CoA used as PhaC substrate (Fukui et al. 1998). The PhaJ<sub>16</sub> was phylogenetically related to the PhaJ4<sub>Re</sub> and PhaJ4b<sub>Re</sub> of *Ralstonia eutropha* (Kawashima et al. 2012), and PhaJ4<sub>Pp</sub> of *P. putida* (Sato et al. 2011) (Supplementary 4A). The amino acid residues Asp39 and His44 conserved at the active site of the dehydratases were identified in PhaJ<sub>16</sub> (Supplementary 3B), except that the Ser residue was replaced by Pro71 in PhaJ<sub>16</sub>, same as in the PhaJ orthologs of *R. eutropha* and *P. putida* PhaJ4.

The three ORFs downstream of the *phaJ*<sub>16</sub> gene encoded PhaC1<sub>16</sub>, PhaZ and PhaC2<sub>16</sub> (Fig. 3A). PhaC1<sub>16</sub> of Class II PHA synthase most closely matched the *Pseudomonas* sp. F15 PhaC1 [GenBank: WP\_021487788], exhibiting 48% amino acid identity. PhaC1<sub>16</sub> was also 42.5% and 43.4% identical to the PhaC1 and PhaC2 proteins of *P. putida* KT2440. Thr318 and Val478 in the PhaC1<sub>16</sub> might favour the 3HB incorporation into PHA as occurred in the engineered PhaC proteins (Takase et al. 2003; Chen et al. 2014). Another putative PHA synthase encoded by the *phaC2*<sub>16</sub> gene downstream of the *phaC1*<sub>16</sub>*phaZ* genes was homologous to unclassified PHA synthases (Fig. 2).

The quantity of PHA accumulated in *P. putida* UW2 carrying clone 16 was comparable to that of parental PpUW1 when grown with octanoate, nonanoic acid or gluconic acid (Table 4). In contrast to the MCL PHA (C6-C8) present in octanoate-grown PpUW2 (clone 1) or wild-type PpUW1, about 20% 3HB was detected in the PHA (C4-C6-C8) accumulated in PpUW2 carrying clone 16 under the same conditions (Table 4). When PpUW2 (clone 16) was grown with nonanoic



acid (C9), 3-hydroxyheptanoate (3HP, C7), 3-hydroxyvalerate (3HV, C5) and 3HB (C4) were polymerized, which was in contrast to the 3HP-3HN PHA in nonanoic acid-grown PpUW with PhaC1 or wild type PpUW1. Additionally, equal amounts of C6 and C8 monomers were detected in the PHA from gluconic acid-grown PpUW2 with clone 16. However, PHA with C8 and C10 monomers was accumulated in PpUW2 (clone 1) and PpUW1 under the same growth conditions. These data implied that the PhaC<sub>16</sub> and/or PhaC<sub>16</sub> prefer substrates with shorter carbon chains than the PhaC<sub>1</sub> in clone 1 and both PhaC proteins of *P. putida* KT2440.

To further elucidate the activity of PhaC<sub>16</sub> and PhaC<sub>16</sub>, the genes were cloned downstream of the constitutively active *Plac* promoter. When *P. putida* PpUW2 carrying pJC123 (*Plac::phaC1<sub>16</sub>*) was grown with octanoate, SCL-MCL copolymer was of similar composition of C4-C6-C8 monomers to that synthesized by clone 16 (Table 4). However, PHA was not detected in strain PpUW2 carrying pJC159 (*Plac::phaC2<sub>16</sub>*) under the same growth conditions. Coexpression of *phaC1<sub>16</sub>* and *phaC2<sub>16</sub>* in pJC157 (*Plac::phaC1<sub>16</sub>-phaC2<sub>16</sub>*) in octanoate-grown PpUW2 resulted in synthesis of PHA with the similar monomer composition as those in the polymers produced in PpUW2 carrying clone 16 or pJC123 (*Plac::phaC1<sub>16</sub>*) (Table 4). These data indicated that only the PhaC<sub>16</sub> was involved in SCL-MCL PHA biosynthesis in clone 16.

The *pha* gene locus of clone 16 was very similar to that of clone 50 (Supplementary 1), but the DNA in clone 50 probably originated from *γ-Proteobacteria Hydrocarboniphata* (Table 3). Both the Class II PhaC1 and unclassified PhaC2 in clones 16 and 50 shared 84% identity respectively. Expression of the *pha* genes was probably driven by a promoter upstream of *phaJ* genes.

## **Class II clone 20 synthesizes MCL or SCL-MCL PHA**



PHA<sup>+</sup> clone 20 contained 30,964-bp metagenomic DNA [GenBank: KT944266], which probably originated from *Salinibacter* within the *Bacteroidetes* (Table 3). The cloned DNA contained only a single *phaC*<sub>20</sub> gene (Fig. 3A). A putative fatty acid CoA ligase/ synthetase [GenBank: ALV86493] (ORF9; Supplementary 1) might be involved in degradation of fatty acids to acyl-CoA (the first step of  $\beta$ -oxidation cycle). The acyl dehydratase PhaJ<sub>20</sub> [GenBank: ALV86492] was 56% identical to the PhaJ<sub>16</sub>. Conserved amino acid residues Asp41 and His46 at the active sites of the acyl dehydratases were present (Supplementary 4B) except that the Ser residue was replaced by Pro73 in the PhaJ<sub>20</sub> protein. The *phaJ*<sub>20</sub>, *phaC*<sub>20</sub> and *phaZ* genes in clone 20 were similar to those of the corresponding genes in clones 16 and 50 (Fig. 3A; Supplementary 1). In addition, the *pha* gene cluster of clone 20 was similar to that in *Burkholderia* sp. 383 (1,576,365 -1,581,635 nt) [GenBank: NC\_007511], but a gene encoding a phasin protein is located between the *phaC* and *phaZ* genes in the *Burkholderia* genome.

The single PhaC<sub>20</sub> [GenBank: ALV86493] best matched to its ortholog from *Burkholderia lata* at 59% amino acid sequence identity [GenBank: WP\_011354994]. PhaC<sub>20</sub> was 46-53% identical to the PhaC<sub>16</sub>, PhaC<sub>2</sub> and PhaC<sub>5</sub> as well as PhaC<sub>1</sub> and PhaC<sub>2</sub> of *P. putida* KT2440. Presence of amino acid residues Thr353 and Val516 in PhaC<sub>20</sub> (Fig. 3B) might favour substrates with fewer carbons than those preferred by clone 1 and *P. putida* PhaC proteins, as previously demonstrated with engineered Class II PHA synthases (Takase et al. 2003; Chen et al. 2014).

Clone 20 was able to synthesize 3HHx-3HO copolymer (C6-C8) with octanoate (Table 4), as occurred in PpUW2 (clone 1) and *P. putida* wild type. However, the proportion of C6 monomer increased 4-35 fold in the PHA isolated from PpUW2 (clone 20), compared to that in PpUW2 (clone 1) and wild-type PpUW1 (Table 4). When nonanoic acid was supplied, PpUW2 (clone 20) produced PHA with 8% 3-hydroxyvalerate (3HV), which was absent in the PHA synthesized by clone 1 and

PpUW1 (Table 4). In contrast to the SCL-MCL PHA produced by clone 16, 3HB was not detected in the nonanoic acid or octanoate-grown PpUW2 with clone 20.

In contrast to the absence of detectable C6 monomer in the PHA produced in PpUW2 with clone 1 or *P. putida* wild type, 3HHx (~10%) was incorporated into the MCL PHA (C6-C8-C10) in PpUW2 (clone 20) (Table 4) when gluconic acid was used as the sole carbon source. About half the quantity of monomers was C10 in the PHA accumulated in PpUW2 (clone 20) grown with gluconic acid. These results suggested that the carbon chain lengths of favourite monomers of PhaC<sub>20</sub> were between those of PhaC<sub>16</sub> and PhaC<sub>21</sub>.

#### **Class I clone 14 synthesizes SCL-MCL PHA**

The DNA in clone 14 probably originated from *β-Proteobacteria Methylibium* (Table 3). The PhaC<sub>14</sub>, PhaA and PhaB [GenBank: ALV86397, ALV86398 and ALV86399] were 65%, 76% and 74% identical to the PhbC1 (A16\_1437), PhbA (A16\_1438) and PhbB1 (A16\_1439) of *C. necator* H16, respectively. In addition, PhaC<sub>14</sub> was 48% identical to the PhbC protein (Smc002960) of *S. meliloti* Rm1021. The best match of PhaC<sub>14</sub> was the PhaC protein of *Burkholderia* JOSHI\_001 at 74% (Table 3). The *phaC<sub>14</sub>AB* locus of clone 14 is similar to that of clones 8, 21 and 23 (Supplementary 1). Expression of the *phaC<sub>14</sub>*, *phaA* and *phaB* genes in clone 14 was most likely driven by a promoter upstream of the *orf9* encoding a hypothetical protein.

When PpUW2 (clone 14) was grown with nonanoic acid, 7% 3HB was incorporated into 3HB-3HV copolymer (Table 4). 3HB was the primary monomer of PHA in octanoate- or gluconic acid-grown PpUW2. Both C6 and C8 monomer were present in the PHA with gluconic acid as carbon source. However, C8 monomer was absent in the PHA when octanoate was supplied (Table 4). *P. putida* PpUW2 carrying clone 14 produced the highest quantity of PHA among all the PHA<sup>+</sup>

clones (Table 4). These results indicated that PhaC<sub>14</sub> could synthesize SCL-MCL copolymer though 3HB was the dominant monomer.

# **Class I clone 18 synthesizes SCL and SCL-MCL PHA**

Clone 18 contained 37,818-bp metagenomic DNA [GenBank: KT944264], which probably originated from *β-Proteobacteria Rubrivirax* (Table 3). The annotated *phaC<sub>18</sub>*, *phaA* and *phaB* were organized in one operon (Fig. 3A), as also occurred in clones 27 and 51 (Supplementary 1). PhaC<sub>18</sub> [GenBank: ALV86462] shared 100% and 99% identity to PhaC<sub>27</sub> [GenBank: ALV86602] and PhaC<sub>51</sub> [GenBank: ALV86651] respectively. The PhaC<sub>18</sub> protein best matched to its homolog in *Azohydromonas australica* (Table 3), and was 71%, 49% and 61% identical to the PhaC<sub>14</sub>, PhbC<sub>Sm</sub> and PhbC<sub>1Re</sub> respectively.

SCL-MCL PHA (C4-C6-C8) was produced when PpUW2 (clone 18) was grown with octanoate (Table 4), as occurred in PpUW2 with clone 16. However, the fraction of C6-C8 monomers was only 3% in the PHA from clone 18, in contrast to the ~83% in the copolymer from clone 16. The yield of PHA was ~7 fold less than that produced by clone 14, but C8 monomer was absent (Table 4). PHA of 3HB-3HV monomers was accumulated in nonanoic acid-grown PpUW2 (clone 18). The ratio of 3HB to 3HV increased 5 fold compared to that in PpUW2 (clone 14) under the same growth conditions (Table 4). When PpUW2 carrying clone 18 was grown on gluconic acid, only PHB was produced. The yield of polymer increased 5 fold compared to that in octanoate-grown cells, and also the second highest quantity of PHA produced among all strains grown on gluconic acid. These results implied that PhaC<sub>18</sub> could synthesize SCL- and SCL-MCL PHA dependent of the available carbon source.

# **Class I clone 19 synthesizes SCL and SCL-MCL PHA**

Clone 19 contained 25,085-bp of DNA that might originate from *β-Protoebacteria Leptothrix* (Table 3) [GenBank: KT944265]. Three ORFs encoded PhaC<sub>19</sub>, PhaA and PhaB for PHA biosynthesis (Fig. 3A). PhaC<sub>19</sub> shared 99% identity with PhaC<sub>6</sub> and PhaC<sub>3</sub> (Fig. 2). The best match for PhaC<sub>19</sub> is the ortholog of *A. australica* at 73% (Table 3). The *phaC<sub>19</sub>AB* genes in clone 19 probably consisted of one operon, and the promoter was located upstream of the *phaC<sub>19</sub>*.

Clone 19 was able to synthesize SCL-MCL PHA (C4-C6-C8) with octanoate but only PHB (C4) in gluconic acid-grown PpUW2 (Table 4), as occurred in PpUW2 carrying clone 18. However ~5 fold more PHA was synthesized by clone 19 than was produced by clone 18 in octanoate medium (Table 4). In contrast, the quantity of PHA was lower in gluconic acid-grown PpUW2 with clone 19 than it was in the same host carrying clone 18. Moreover, PHA composed of 3HB-3HV monomers was synthesized in noanoic acid-grown PpUW2 (clone 19), as occurred in PpUW2 (clone 18). These data suggested that PhaC<sub>19</sub> was able to synthesize both SCL and SCL-MCL PHA.

# **Class I clone 25 synthesizes SCL and SCL-MCL PHA**

Clone 25 contained 41,012-bp of DNA [GenBank: KT944269], which was predicted to originate from *β-Proteobacteria Variovorax* (Table 3). The *phaC<sub>25</sub>* and *phaA* genes were apparently located in a single operon (Fig. 3A). A *phaB* gene was located 9 open reading frames downstream of the *phaA*. The *phaC<sub>25</sub>A* and *phaB* loci in clone 25 are similar to those in clone P1N3 (Supplementary 1), though the *phaB* gene in clone P1N3 was four open reading frames away from *phaC<sub>P1N3A</sub>*. PhaC proteins of clones P1N3 and 25 shared 77% identity. In addition, PhaC<sub>25</sub> was 35% and 61% identical to PhbC<sub>Sm</sub> and PhbC<sub>1Re</sub>. The conserved amino acid Asp130 affecting PhaC substrate specificity (Matsumoto et al. 2005) was replaced by Ala152 (Fig. 3B).

SCL-MCL PHA (C4-C6-C8) was produced in PpUW2 harbouring clone 25 when grown on octanoate, and only PHB (C4) was isolated from gluconic acid-grown cells (Table 4). Similar results were obtained in PpUW2 with clone 18 or clone 19 under the same conditions. However, the quantity of C6-C8 monomers was greater with clone 25 than those with clone 18 or 19. Nonanoic acid-grown PpUW2 (clone 25) produced 3HB-3HV copolymer similar to that from PpUW2 with clone 18 or clone 19 (Table 4). These data suggested that PhaC<sub>25</sub> had similar properties to those of PhaC<sub>18</sub> and PhaC<sub>29</sub>, but different from that of PhaC<sub>14</sub>.

#### **Complementation of *S. meliloti* phaC mutant with 11AW PHA<sup>+</sup> clones**

In an earlier study, *S. meliloti* Rm11476 (*exoY::Tn5 phaC::Tn5-233*) had been employed for functionally harvesting metagenomic library clones pCX92, pCX9M1, pCX9M3 and pCX9M5 expressing Class I PHA synthases (Schallmeyer et al. 2011). The PhaA/PhbB and PhaB/PhbB proteins encoded by the cloned metagenomic DNA and/or *S. meliloti* genome could supply (R)-3-hydroxybutyrate for PHB biosynthesis catalyzed by the PhaC/PhbC enzymes. In order to examine the possibility that the PHA<sup>+</sup> clones of 11AW metagenomic library were able to complement the PHA<sup>-</sup> phenotype of *S. meliloti* Rm11476, the Class I clones 14, 18, 19 and 25 (Table 3) were introduced into *S. meliloti* Rm11476. In each case, complementation was observed, indicating PhaC function in the *S. meliloti* background (Fig. 4), with greatest accumulation of PHA observed with clone 14. However, when clones pCX92, pCX9M1, pCX9M3 and pCX9M5 were transferred to *P. putida* PpUW2 (PHA<sup>-</sup>), PHA was not detected in the recombinant strains grown with either octanoate or gluconic acid (data not shown). These results strengthen the argument that multiple hosts should be employed to screen for novel *phaC* genes.

We then asked whether Class II *phaC* could function in the *S. meliloti* background. First, we observed no detection of PHA when *phaCI<sub>Pp</sub>* (*Plac::phaCI<sub>Pp</sub>*) was expressed in Rm11476 even though the *lac* promoter is functional and 3-hydroxybutyrate is supplied by the PhbAB<sub>Sm</sub>. Similarly, PHA<sup>+</sup> clones 1 and 20 carrying Class II *phaC* genes also failed to complement the PHB<sup>-</sup> phenotype of *S. meliloti* Rm11476 (Fig. 4), implying that the *phaC<sub>21</sub>* and *phaC<sub>20</sub>* genes were not expressed and/or the substrate (R)-3-hydroxyalkanoic acids were absent in *S. meliloti*. However, when clone 16 was introduced into *S. meliloti* Rm11476, PHA was accumulated to a similar level as with Rm11476 containing PHB<sup>+</sup> clones pCX92, pCX9M1, pCX9M3 or pCX9M5 (Fig. 4). These data indicated that the *phaCI<sub>16</sub>* gene was expressed and its product was functional. These results suggest that *P. putida* is a more permissive surrogate host than *S. meliloti* for screening of novel PHA synthases.

## Discussion

Biosynthesis of SCL-MCL PHA requires PHA synthases having a broad range of substrate specificity and SCL and MCL precursors (R-3-hydroxyacyl-CoAs) must be available within the cell. Building on earlier work that has sought to mine metagenomic DNA for modification of bacterial PHA production, we have successfully isolated cosmid clones that are able to functionally complement a *P. putida* PHA synthesis mutant. DNA sequence analysis revealed that the isolated metagenomic DNA originated from a broad diversity of bacteria, and encoded either Class I or Class II PHA synthases enzymes. Of note is that DNA from most of the isolated clones did not very closely match known sequences. Also of interest is the influence that the clones had on the quality and quantity of PHA produced in the *P. putida* surrogate host background.

A major appeal of PHA is that, as alternatives to conventional fossil fuel-derived plastics, they can be produced from renewable resources. The potential to improve the efficiency and cost of production, and expand the range of polymers and copolymers that are available for production, should impact on competitiveness and adoption of these materials in the marketplace. In this context, it is important to understand how the properties of PHA are determined by the PHA synthase enzyme and the substrate that is available to those enzymes, which is in turn influenced by the culture conditions and the metabolic pathways leading to substrate formation (Meng et al. 2014). PHA consisting of both short-chain-length (SCL,  $\leq C5$ ) and medium-chain-length (MCL,  $\geq C6$ ) monomers have great flexibility, decreased breakage and reduced melting point (Noda et al. 2005). Most naturally occurring PhaC proteins polymerize either SCL- or MCL-monomers, but there are a few known examples such as the Class I PhaC of *Aeromonas caviae* (Fukui and Doi 1997) and some *Pseudomonas* Class II PhaC (Matsusaki et al. 1998) that can synthesize SCL-MCL copolymers.

In the present work, heterologous complementation of the *P. putida* PHA<sup>-</sup> strain facilitated efficient simultaneous screening of millions of 11AW metagenomic clones, resulting in recovery of a greater number of novel Class I, Class II, and unclassified PHA synthases than from previous reports (Schallmeyer et al. 2011; Cheema et al. 2012). Additionally, the clones carrying Class I *phaC* isolated in *P. putida* were able to complement the PHA<sup>-</sup> phenotype of *S. meliloti*, but the previously isolated Class I clones isolated in *S. meliloti* (Schallmeyer et al. 2011) failed to synthesize PHA in *P. putida*. These results support the development of multi-host systems to increase the chances of the successful expression of *pha* genes of interest.

Biosynthesis of SCL-MCL PHA of various forms by Class I clones 14, 18, 19 and 25 and Class II clones 16 and 20 suggested availability of a full range of R-3-hydroxyacyl-CoAs derived from  $\beta$ -oxidation of fatty acids such as nonanoic acid and octanoate. The differential monomer

compositions in PHA synthesized by the Class II enzymes PhaC<sub>16</sub> and PhaC<sub>20</sub> are of particular interest, especially since most Class II PHA synthases are unable to incorporate SCL monomers such as 3HB and 3HV. Changes of conserved amino acid residues Ser325Thr, Leu484Val, and Glu508Leu (conserved positions in *P. putida* PhaC1) have been identified to be involved in PhaC substrate specificity and PHA yield (Takase et al. 2003; Shozui et al. 2010; Chen et al. 2014). Presence of the amino acids Thr353 (corresponding to *P. putida* PhaC1 position 325), Val516 (corresponding to *P. putida* PhaC1 position 484) and Ala540 (corresponding to *P. putida* PhaC1 position 508) PhaC<sub>20</sub> might contribute to the enzyme's ability to incorporate SCL monomers compared to those of 11AW PhaC<sub>21</sub> and PHA synthases of *P. putida* KT2440. Similarly, the presence of three residues (Thr317, Val478 and Leu502) at these positions in PhaC<sub>16</sub>, most likely resulted in increased 3HB content as demonstrated previously with engineered Class II PHA synthases (Takase et al. 2003; Shozui et al. 2010; Chen et al. 2014).

## Conclusions

We obtained 27 clones encoding Class I, II and unclassified PHA synthases by functional screening of soil metagenomic cosmid clones in a *P. putida* PHA<sup>-</sup> strain. Seven clones that were characterized in more detail were able to produce a broad range of polymers and copolymers, including SCL-MCL mixtures, depending on carbon source. Through this work we have demonstrated the potential for using metagenome-derived clones for production of a variety of PHAs of possible industrial utility. The collection of PHA metabolism genes from uncultivated organisms provides not only a resource for production strain development, but also a series of sequence templates that could prove useful in enzyme engineering efforts directed towards generation of PHA products with desired properties.



532

### 533 **Nucleotide sequence accession numbers**

534 Complete sequences of 11AW metagenomic PHA<sup>+</sup> DNA have been deposited in GenBank  
535 nucleotide sequence database [GenBank: KT944254-KT944278, KU728995 and KU728996].

536

### 537 **Abbreviations**

538 *P. putida*, *Pseudomonas putida*; PHA, polyhydroxyalkanoate; PhaA/PhbA,  $\beta$ -ketothiolase;  
539 PhaB/PhbB, acetoacetyl-CoA reductase; PhaC/PhbC, PHA synthase; PhaZ, PHA depolymerase;  
540 PhaJ, R-specific enoyl-CoA hydratase; 3HA, 3-hydroxyalkanoate; 3HB, 3-hydroxybutyrate; 3HV,  
541 3-hydroxyvalerate; 3HHx, 3-hydroxyhexanoate; 3HP, 3-hydroxyheptanoate; 3HO, 3-  
542 hydroxyoctanoate; 3HN, 3-hydroxynonanoate; 3HD, 3-hydroxydecanoate; SCL, short chain length;  
543 MCL, medium chain length; *S. meliloti*, *Sinorhizobium meliloti*; GC-MS, gas chromatography-mass  
544 spectrometry; CDW, cell dry weight.

545

### 546 **Authors's contributions**

547 JC and TCC conceived and designed this study, carried out all the experiments, and prepared  
548 the manuscript. Both authors read and approved the final manuscript.

549

### 550 **Acknowledgements**

551 We are very grateful to Ricardo Nordeste for assisting with GC-MS analysis of PHA. We  
552 wish to thank Dr. Bruce Ramsay (Polyferm Canada) for providing PHA standards, and Dr. Josh  
553 Neufeld for use of the FilterMax F5 Multi-mode microplate reader.

554

## **Funding**

This work was financially supported by a New Directions grant from Ontario Ministry of Agriculture, Food, and Rural Affairs (award number 381646-09), by a Strategic Projects grant from the Natural Sciences and Engineering Research Council of Canada (award number ND2012-1679), and by Genome Canada, through the Applied Genomics Research in Bioproducts or Crops (ABC) program for the grant titled “Microbial Genomics for Biofuels and Co-Products from Biorefining Processes” awarded to David Levin and Richard Sparling.

## **Conflict of interest**

Trevor Charles received partial financial support for presenting some of this material at the Society for Industrial Microbiology and Biotechnology Annual Meeting in 2014 and 2015. Jiuju Cheng declares no conflict of interest.

## **Ethical statement**

The authors certify that this manuscript has not been published previously, and not under consideration for publication elsewhere, in whole or in part. No data have been fabricated or manipulated (including images), and no data, text, or theories by others are presented as if they were the authors’ own. Consent to submit has been received explicitly from all the authors listed. And authors whose names appear on the submission have contributed sufficiently to the scientific work and therefore share collective responsibility and accountability for the results. This article does not contain any studies with human participants or animals performed by any of the authors.

## References

- Cheema S, Bassas-Galia M, Sarma PM, Lal B, Arias S (2012) Exploiting metagenomic diversity for novel polyhydroxyalkanoate synthases: Production of a terpolymer poly(3-hydroxybutyrate-co-3-hydroxyhexanoate-co-3-hydroxyoctanoate) with a recombinant *Pseudomonas putida* strain. *Bioresource Technology* 103:322–328. doi: 10.1016/j.biortech.2011.09.098
- Chen Y-J, Tsai P-C, Hsu C-H, Lee C-Y (2014) Critical residues of class II PHA synthase for expanding the substrate specificity and enhancing the biosynthesis of polyhydroxyalkanoate. *Enzyme and Microbial Technology* 56:60–66. doi: 10.1016/j.enzmictec.2014.01.005
- Cheng J, Pinnell L, Engel K, Neufeld JD, Charles TC (2014) Versatile broad-host-range cosmids for construction of high quality metagenomic libraries. *Journal of Microbiological Methods* 99:27–34. doi: 10.1016/j.mimet.2014.01.015
- de Eugenio LI, Escapa IF, Morales V, Dinjaski N, Galán B, García JL, Prieto MA (2010) The turnover of medium-chain-length polyhydroxyalkanoates in *Pseudomonas putida* KT2442 and the fundamental role of PhaZ depolymerase for the metabolic balance. *Environ Microbiol* 12:207–221. doi: 10.1111/j.1462-2920.2009.02061.x
- Edgar RC (2004) MUSCLE: a multiple sequence alignment method with reduced time and space complexity. *BMC Bioinformatics* 5:113–19. doi: 10.1186/1471-2105-5-113
- Escapa IF, Morales V, Martino VP, Pollet E, Avérous L, García JL, Prieto MA (2011) Disruption of  $\beta$ -oxidation pathway in *Pseudomonas putida* KT2442 to produce new functionalized PHAs with thioester groups. *Appl Microbiol Biotechnol* 89:1583–1598. doi: 10.1007/s00253-011-3099-4
- Fellay R, Frey J, Krisch H (1987) Interposon mutagenesis of soil and water bacteria: a family of DNA fragments designed for in vitro insertional mutagenesis of gram-negative bacteria. *Gene* 52:147–154.
- Foong CP, Lau N-S, Deguchi S, Toyofuku T, Taylor TD, Sudesh K, Matsui M (2014) Whole genome amplification approach reveals novel polyhydroxyalkanoate synthases (PhaCs) from Japan trench and nankai trough seawater. *BMC Microbiol* 14:e11836. doi: 10.1186/s12866-014-0318-z
- Fukui T, Doi Y (1997) Cloning and analysis of the poly(3-hydroxybutyrate-co-3-hydroxyhexanoate) biosynthesis genes of *Aeromonas caviae*. *J Bacteriol* 179:4821–4830. doi: 10.1186/s12866-014-0318-z
- Fukui T, Shiomi N, Doi Y (1998) Expression and characterization of (R)-specific enoyl coenzyme A hydratase involved in polyhydroxyalkanoate biosynthesis by *Aeromonas caviae*. *J Bacteriol* 180:667–673.
- Hoppensack A, Rehm BH, Steinbüchel A (1999) Analysis of 4-phosphopantetheinylation of polyhydroxybutyrate synthase from *Ralstonia eutropha*: generation of beta-alanine auxotrophic Tn5 mutants and cloning of the *panD* gene region. *J Bacteriol* 181:1429–1435.

- Jia Y, Kappock TJ, Frick T, Sinskey AJ, Stubbe J (2000) Lipases provide a new mechanistic model for polyhydroxybutyrate (PHB) synthases: characterization of the functional residues in *Chromatium vinosum* PHB synthase. *Biochemistry* 39:3927–3936. doi: 10.1021/bi9928086
- Kawashima Y, Cheng W, Mifune J, Orita I, Nakamura S, Fukui T (2012) Characterization and functional analyses of R-specific enoyl coenzyme A hydratases in polyhydroxyalkanoate-producing *Ralstonia eutropha*. *Appl Environ Microbiol* 78:493–502. doi: 10.1128/AEM.06937-11
- Keshavarz T, Roy I (2010) Polyhydroxyalkanoates: bioplastics with a green agenda. *Current Opinion in Microbiology* 13:321–326. doi: 10.1016/j.mib.2010.02.006
- Lam KN, Hall MW, Engel K, Vey G, Cheng J, Neufeld JD, Charles TC (2014) Evaluation of a pooled strategy for high-throughput sequencing of cosmid clones from metagenomic libraries. *PLoS ONE* 9:e98968. doi: 10.1371/journal.pone.0098968
- Matsumoto K, Takase K, Aoki E, Doi Y, Taguchi S (2005) Synergistic effects of Glu130Asp substitution in the type II polyhydroxyalkanoate (PHA) synthase: enhancement of PHA production and alteration of polymer molecular weight. *Biomacromolecules* 6:99–104. doi: 10.1021/bm049650b
- Matsusaki H, Manji S, Taguchi K, Kato M, Fukui T, Doi Y (1998) Cloning and molecular analysis of the Poly(3-hydroxybutyrate) and Poly(3-hydroxybutyrate-co-3-hydroxyalkanoate) biosynthesis genes in *Pseudomonas* sp. strain 61-3. *J Bacteriol* 180:6459–6467.
- Meng D-C, Shen R, Yao H, Chen J-C, Wu Q, Chen G-Q (2014) Engineering the diversity of polyesters. *Curr Opin Biotechnol* 29:24–33. doi: 10.1016/j.copbio.2014.02.013
- Noda I, Green PR, Satkowski MM, Schechtman LA (2005) Preparation and properties of a novel class of polyhydroxyalkanoate copolymers. *Biomacromolecules* 6:580–586. doi: 10.1021/bm049472m
- Park SJ, Kim TW, Kim MK, Lee SY, Lim S-C (2012) Advanced bacterial polyhydroxyalkanoates: towards a versatile and sustainable platform for unnatural tailor-made polyesters. *Biotechnology Advances* 30:1196–1206. doi: 10.1016/j.biotechadv.2011.11.007
- Patil KR, Roune L, McHardy AC (2012) The PhyloPythiaS web server for taxonomic assignment of metagenome sequences. *PLoS ONE* 7:e38581. doi: 10.1371/journal.pone.0038581
- Pärnänen K, Karkman A, Virta M, Eronen-Rasimus E, Kaartokallio H (2015) Discovery of bacterial polyhydroxyalkanoate synthase (PhaC)-encoding genes from seasonal Baltic Sea ice and cold estuarine waters. *Extremophiles* 19:197–206. doi: 10.1007/s00792-014-0699-9
- Quandt J, Hynes MF (1993) Versatile suicide vectors which allow direct selection for gene replacement in Gram-negative bacteria. *Gene* 127:15–21. doi: 10.1016/0378-1119(93)90611-6
- Rehm BHA (2003) Polyester synthases: natural catalysts for plastics. *Biochem J* 376:15–33. doi: 10.1042/BJ20031254

- 653 Sato S, Kanazawa H, Tsuge T (2011) Expression and characterization of (R)-specific enoyl  
654 coenzyme A hydratases making a channeling route to polyhydroxyalkanoate biosynthesis in  
655 *Pseudomonas putida*. Appl Microbiol Biotechnol 90:951–959. doi: 10.1007/s00253-011-3150-5
- 656 Schallmeyer M, Ly A, Wang C, Meglei G, Voget S, Streit WR, Driscoll BT, Charles TC (2011)  
657 Harvesting of novel polyhydroxyalkanoate (PHA) synthase encoding genes from a soil  
658 metagenome library using phenotypic screening. FEMS Microbiol Lett 321:150–156. doi:  
659 10.1111/j.1574-6968.2011.02324.x
- 660 Sheu DS, Wang YT, Lee CY (2000) Rapid detection of polyhydroxyalkanoate-accumulating  
661 bacteria isolated from the environment by colony PCR. Microbiology 146 ( Pt 8):2019–2025.  
662 doi: 10.1099/00221287-146-8-2019
- 663 Shozui F, Sun J, Song Y, Yamada M, Sakai K, Matsumoto K, Takase K, Taguchi S (2010) A new  
664 beneficial mutation in *Pseudomonas* sp. 61-3 polyhydroxyalkanoate (PHA) synthase for  
665 enhanced cellular content of 3-hydroxybutyrate-based PHA explored using its enzyme homolog  
666 as a mutation template. Biosci Biotechnol Biochem 74:1710–1712. doi: 10.1271/bbb.100224
- 667 Simon C, Daniel R (2011) Metagenomic analyses: past and future trends. Appl Environ Microbiol  
668 77:1153–1161. doi: 10.1128/AEM.02345-10
- 669 Steinbüchel A, Lütke-Eversloh T (2003) Metabolic engineering and pathway construction for  
670 biotechnological production of relevant polyhydroxyalkanoates in microorganisms. Biochemical  
671 Engineering Journal 16:81–96. doi: 10.1016/S1369-703X(03)00036-6
- 672 Tai YT, Foong CP, Najimudin N, Sudesh K (2015) Discovery of a new polyhydroxyalkanoate  
673 synthase from limestone soil through metagenomic approach. Journal of Bioscience and  
674 Bioengineering. doi: 10.1016/j.jbiosc.2015.08.008
- 675 Takase K, Taguchi S, Doi Y (2003) Enhanced synthesis of poly(3-hydroxybutyrate) in recombinant  
676 *Escherichia coli* by means of error-prone PCR mutagenesis, saturation mutagenesis, and in vitro  
677 recombination of the type II polyhydroxyalkanoate synthase gene. J Biochem 133:139–145.
- 678 Tamura K, Stecher G, Peterson D, Filipinski A, Kumar S (2013) MEGA6: Molecular Evolutionary  
679 Genetics Analysis version 6.0. Mol Biol Evol 30:2725–2729. doi: 10.1093/molbev/mst197
- 680 Tortajada M, da Silva LF, Prieto MA (2013) Second-generation functionalized medium-chain-length  
681 polyhydroxyalkanoates: the gateway to high-value bioplastic applications. Int Microbiol 16:1–15.  
682 doi: 10.2436/20.1501.01.175
- 683 Tripathi L, Wu L-P, Dechuan M, Chen J, Wu Q, Chen G-Q (2013) *Pseudomonas putida* KT2442 as  
684 a platform for the biosynthesis of polyhydroxyalkanoates with adjustable monomer contents and  
685 compositions. Bioresource Technology 142:225–231. doi: 10.1016/j.biortech.2013.05.027
- 686 Verlinden RAJ, Hill DJ, Kenward MA, Williams CD, Radecka I (2007) Bacterial synthesis of  
687 biodegradable polyhydroxyalkanoates. J Appl Microbiol 102:1437–1449. doi: 10.1111/j.1365-  
688 2672.2007.03335.x

- Wu H-A, Sheu D-S, Lee C-Y (2003) Rapid differentiation between short-chain-length and medium-chain-length polyhydroxyalkanoate-accumulating bacteria with spectrofluorometry. *Journal of Microbiological Methods* 53:131–135. doi: 10.1016/S0167-7012(02)00232-4
- Zhu W, Lomsadze A, Borodovsky M (2010) Ab initio gene identification in metagenomic sequences. *Nucleic Acids Research* 38:e132–e132. doi: 10.1093/nar/gkq275

## Figure legends

Fig. 1. Activity-based screening of 11AW metagenomic library clones carrying PHA biosynthesis genes in *P. putida* PpUW2 (PHA<sup>-</sup>). PpUW2 recombinant strains were grown in 0.1N M63 medium containing 0.5% Na octanoate and Nile red (0.5 µg/ml). Cosmid pJC8 and pJC67 (*Plac::phaC1<sub>Pp</sub>*) were used as negative and positive controls respectively. 11AW clones 14 and 16 were streaked on the same selection plate to verify the PHA<sup>+</sup> phenotype initially screened on LB with 0.5% (w/v) octanoate.

Fig. 2. Phylogenetic analysis of the polyhydroalkanoate synthases (PhaC) of 11AW metagenomic library clones. Protein sequence alignments were performed using MUSCLE (Edgar 2004). Neighbour-joining phylogenetic trees were generated with MEGA6 (Tamura et al. 2013). GenBank accession numbers of 11AW PhaC proteins: PhaC<sub>21</sub> (ALV86274), PhaC<sub>3</sub> (ALV86289), PhaC<sub>4</sub> (ALV86299), PhaC<sub>5</sub> (ALV86308), PhaC<sub>6</sub> (ALV86351), PhaC<sub>7</sub> (partial, ALV86358), PhaC<sub>8</sub> (ALV86364), PhaC<sub>10</sub> (partial, ALV86387), PhaC<sub>14</sub> (ALV86397), PhaC<sub>16</sub> (ALV86417), PhaC<sub>216</sub> (ALV86419), PhaC<sub>18</sub> (ALV86462), PhaC<sub>19</sub> (ALV86476), PhaC<sub>20</sub> (ALV86493), PhaC<sub>21</sub> (ALV86517), PhaC<sub>23</sub> (ALV86529), PhaC<sub>25</sub> (ALV86574), PhaC<sub>27</sub> (ALV86602), PhaC<sub>150</sub> (ALV86626), PhaC<sub>250</sub> (ALV86626), PhaC<sub>51</sub> (ALV86651), PhaC<sub>P1N3</sub> (ALV86715), PhaC<sub>P2N8</sub> (ALV86750), PhaC<sub>P2N10</sub> (partial, ALV86755), PhaC<sub>P4N10</sub> (ALV86768), PhaC<sub>P8N7</sub> (ALV86771).

714  
 715 Fig. 3. The *pha* genes and PhaC proteins in 11AW metagenomic DNA library clones. (A) The PHA<sup>+</sup>  
 716 clones are classified into Class I and II based on the PhaC protein sequences. (B) Conserved amino  
 717 acids required for the activity of PHA synthases are indicated in closed triangles. Residues affecting  
 718 substrate specificity were marked by open triangles. The positions of amino acid residues were  
 719 numbered based on the sequence of PhaC<sub>16</sub> [GenBank: ALV86417]. GenBank accession numbers  
 720 of PhaC proteins: PhaC<sub>14</sub>, ALV86397; PhaC<sub>18</sub>, ALV86462; PhaC<sub>19</sub>, ALV86476; PhaC<sub>25</sub>,  
 721 ALV86574; PhaC<sub>12</sub>, ALV86274; PhaC<sub>20</sub>, ALV86493; PhaC<sub>16</sub>, ALV86417; *C. necator* PhbC1,  
 722 AAA21975; *P. putida* PhaC1, Q88D25; and *P. sp.* 61-3 PhaC1, BAA36200.

723  
 724 Fig. 4. Complementation of *S. meliloti* Rm11476 (*phbC*) with metagenomic clones. The cosmid  
 725 DNA of PHA<sup>+</sup> clones encoding Class I and II PHA synthases was transferred to *S. meliloti* Rm11476  
 726 by conjugation. Recombinant strains were grown in YM medium. PHA production was estimated by  
 727 measuring the fluorescence of Nile red stained cells. *S. meliloti* wild type Rm1021 and previously  
 728 isolated Class I clones (CX92, pCX92M1, pCX92M3, and pCX92M5; (Schallmeyer et al. 2011)) were  
 729 used as controls.



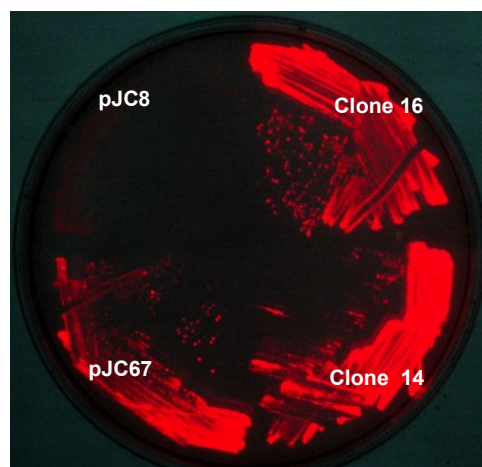

Figure 1.



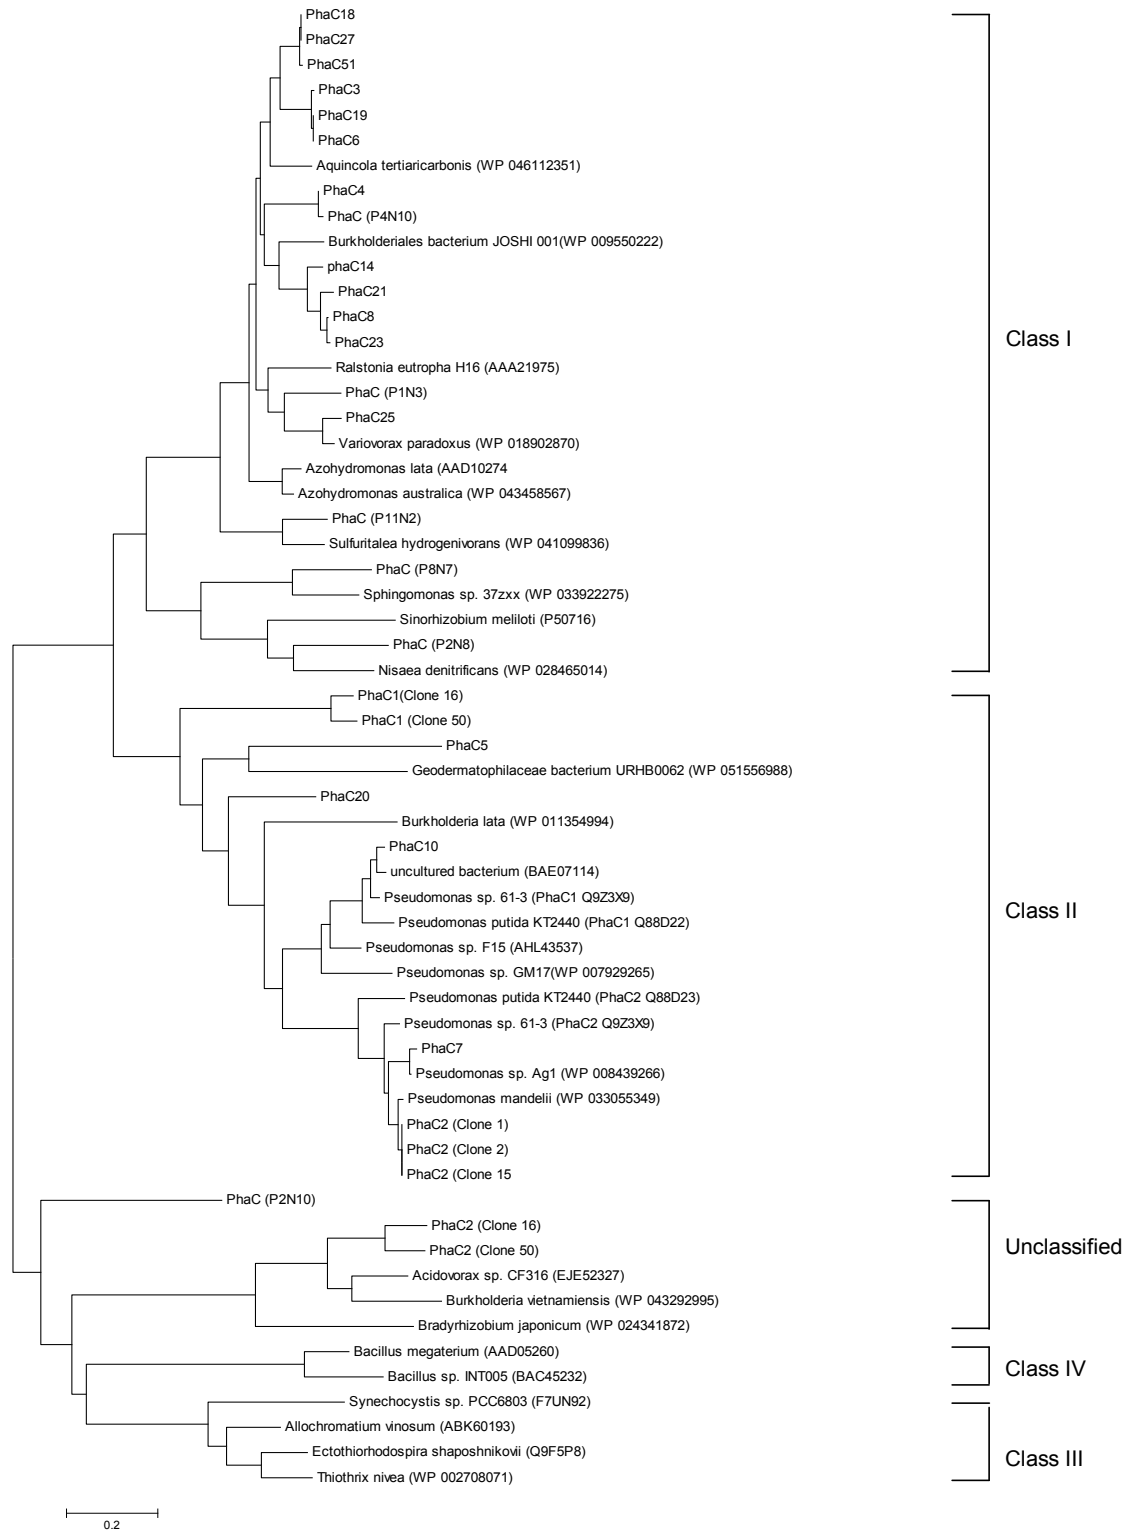

Fig. 2

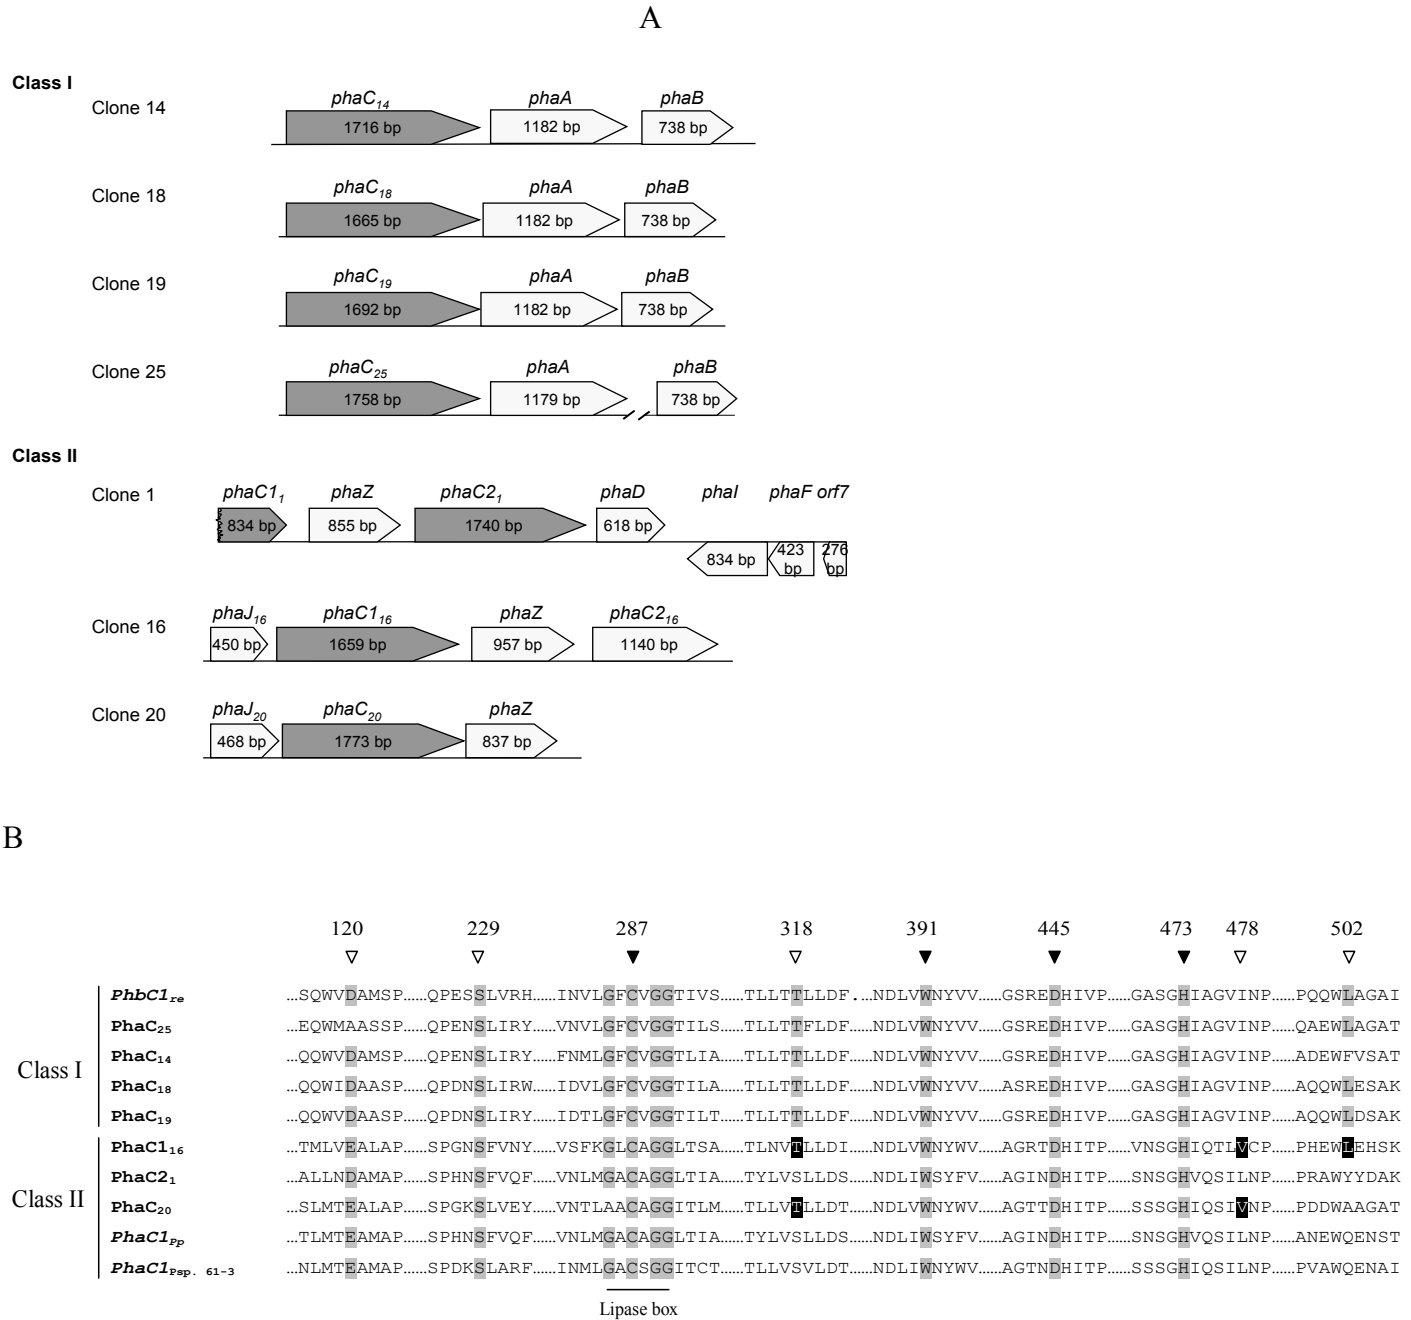

Fig. 3

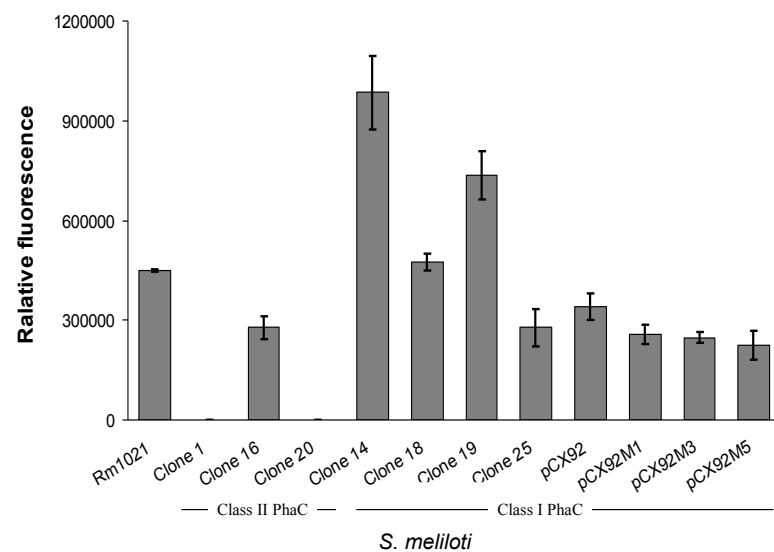

Fig. 4

Table 1. Bacterial strains, plasmids and cosmids

| Strain, plasmids and cosmids | Relevant characteristics*                                                                                                        | Reference                 |
|------------------------------|----------------------------------------------------------------------------------------------------------------------------------|---------------------------|
| <i>E. coli</i>               |                                                                                                                                  |                           |
| DH5α                         | F <sup>-</sup> φ80 <i>lacZ</i> Δ <i>M15</i> Δ( <i>lacZYA-argF</i> )U169 <i>recA1 endA1 hsdR17 phoA supE44 thi-1 gyrA96 relA1</i> | Life Technologies         |
| DH5α (Rif <sup>R</sup> )     | A spontaneous Rif <sup>r</sup> mutant of DH5α                                                                                    | (Cheng et al. 2014)       |
| HB101                        | F <sup>-</sup> <i>thi-1 hsdS20 supE44 recA13 ara-14 leuB6 proA2 lacY1 galK2 rpsL20 xyl-5 mtl-1</i> , Sm <sup>R</sup>             | Life Technologies         |
| <i>S. meliloti</i>           |                                                                                                                                  |                           |
| Rm1021                       | Wild type, Sm <sup>R</sup>                                                                                                       | Lab collection            |
| Rm11476                      | Rm1021, <i>exoY::Tn5 phbC::Tn5-233</i> , Sm <sup>R</sup> Nm <sup>R</sup>                                                         | (Schallmeyer et al. 2011) |
| <i>P. putida</i>             |                                                                                                                                  |                           |
| KT2440                       | Wild type                                                                                                                        | Lab collection            |
| PpUW1                        | A spontaneous Rif <sup>R</sup> mutant of KT2440, Rif <sup>R</sup>                                                                | This study                |
| PpUW2                        | PpUW1 ( <i>phaC1-phaZ-phaC2::ΩKm<sup>R</sup></i> ), Rif <sup>R</sup> Km <sup>R</sup>                                             | This study                |
| Plasmids/cosmids             |                                                                                                                                  |                           |
| pRK600                       | pRK2013 <i>tra</i> Nm <sup>R</sup> ::Tn9, Cm <sup>R</sup>                                                                        | Lab collection            |
| pRK7813                      | IncP <i>oriT cos lacZα</i> , Tc <sup>R</sup>                                                                                     | Lab collection            |
| pJC8                         | Broad-host-range Gateway <sup>®</sup> entry cosmid, Tc <sup>R</sup>                                                              | (Cheng et al. 2014)       |
| pJQ200-SK                    | Cloning vector, <i>sacB</i> , Gm <sup>R</sup>                                                                                    | (Quandt and Hynes 1993)   |
| pHP45-ΩKm <sup>R</sup>       | Ω-Km <sup>R</sup> cassette, Km <sup>R</sup>                                                                                      | (Fellay et al. 1987)      |
| pJC63                        | pJQ200-SK carrying 5'- <i>phaC1</i> of <i>P. putida</i> KT2440, Gm <sup>R</sup>                                                  | This study                |
| pJC69                        | pJC63 carrying 3'- <i>phaC2</i> of <i>P. putida</i> KT2440, Gm <sup>R</sup>                                                      | This study                |
| pJC71                        | pJC69 carrying Ω-Km <sup>R</sup> between the <i>phaC1'</i> and <i>phaC2'</i> fragments, Gm <sup>R</sup> Km <sup>R</sup>          | This study                |
| pJC67                        | pRK7813 carrying <i>Plac::phaC1<sub>pp</sub></i> , Tc <sup>R</sup>                                                               | This study                |
| pJC123                       | pRK7813 carrying <i>Plac::phaC1<sub>16</sub></i> , Tc <sup>R</sup>                                                               | This study                |
| pJC157                       | pRK7813 carrying <i>Plac::phaC1<sub>16</sub>::phaC2<sub>16</sub></i> , Tc <sup>R</sup>                                           | This study                |
| pJC159                       | pRK7813 carrying <i>Plac::phaC2<sub>16</sub></i> , Tc <sup>R</sup>                                                               | This study                |
| pCX92                        | pRK7813 carrying <i>phaC</i> and <i>phaP</i> , Tc <sup>R</sup>                                                                   | (Schallmeyer et al. 2011) |
| pCX9M1                       | pRK7813 carrying <i>phaC</i> , <i>phaA</i> and <i>phaB</i> , Tc <sup>R</sup>                                                     | (Schallmeyer et al. 2011) |
| pCX9M3                       | pRK7813 carrying <i>phaC</i> , Tc <sup>R</sup>                                                                                   | (Schallmeyer et al. 2011) |
| pCX9M5                       | pRK7813 carrying <i>phaC</i> and <i>phaB</i> , Tc <sup>R</sup>                                                                   | (Schallmeyer et al. 2011) |

\*Antibiotic resistances: Cm<sup>r</sup>, chloramphenicol; Gm<sup>R</sup>, gentamycin; Km<sup>R</sup>, kanamycin; Nm<sup>R</sup>, neomycin; Sm<sup>R</sup>, streptomycin; Tc<sup>R</sup>, tetracycline.

Table 2. DNA oligonucleotides

| Oligo ID     | Sequence                                                               |
|--------------|------------------------------------------------------------------------|
| JC159        | CGCCAAGCTT <b>GTG</b> <u>AGGAG</u> CGTCGTAGATGAGTAAC                   |
| JC160        | GCGCGGATCCTCAACGCTCGTGAACGTAGGT                                        |
| JC161        | GCGCTCTAGACACGAAAGTCGGGTAACCAAT                                        |
| JC162        | GGTCGGATCCCGCCAGCTGATGATGAAGGTC                                        |
| JC163        | GCTGGGATCCGTTGTGGCTGGAGTGGATCAC                                        |
| JC164        | CGCCCTCGAGCACCGGTACCCTGATCTGATA                                        |
| phaCF1       | ATCAACAARTWCTACRTCYTSGACCT                                             |
| phaCR2       | GTSTTCRTSRTSWSCTGGCGCAACCC                                             |
| phaCR4       | AGGTAGTTGTYGACSMMRTAGKTCCA                                             |
| JC202        | CCGGATGCAT <b>GAT</b> <u>AGGA</u> CGCCGGATGACAGCAGAGAAGGCTGAG          |
| KC228        | CCCAGATCTGCAGTATTCTAGATTTCAGGCGCGCACGCGCACGTA                          |
| JC204        | CCGGTCTAG <u>AGGA</u> ACGTCCCATGAGCAATCC                               |
| JC205        | GGGGATGCATGCCTCAGGCGAAGTACTGGCCGCCATTG                                 |
| JC301        | CGCGAAGCTT <b>CTGA</b> <u>AGGAG</u> AGAACACATGGCGAAGACCA               |
| JC302        | GGGGAATTCTGAATATCAGCGTCGGAGCATG                                        |
| JC333        | CGCGAAGCTT <b>GTG</b> <u>AGGAG</u> AGATCTATGAGCTCCCTCCCCGTGGCCGAACGTTC |
| JC334        | CGCTGAATTCTCTACGCCGCTGACCCACGAT                                        |
| JC337        | ACCAGAATTC <u>AGGAG</u> ATCTATATGAGCTCCCTCCCCGTGGCCGAAC                |
| pJET forward | CGACTCACTATAGGGAGAGCGGC                                                |
| pJET reverse | AAGAACATCGATTTTCCATGGCAG                                               |

Restriction sites are underlined. Translation stop codon is in bold, and ribosomal binding site is

double underlined.

Table 3. 11AW metagenomic clones encoding PHA synthases (PhaC).

| PHA <sup>+</sup> Clones  | DNA (bp) | GC content (%) | Possible origin of cloned DNA                   | Best match of PHA synthases                                                                        | Identity (%) | Cosmid Genbank ID |
|--------------------------|----------|----------------|-------------------------------------------------|----------------------------------------------------------------------------------------------------|--------------|-------------------|
| <b>Class I</b>           |          |                |                                                 |                                                                                                    |              |                   |
| 3                        | >16,077  | 67.5           | <i>Leptothrix</i> (̑-Proteobacteria)            | Hypothetical protein (WP_046112351), <i>Aquicola tertiarycarbonis</i>                              | 74           | KT944255          |
| 4                        | 40,585   | 65.7           | <i>Leptothrix</i> (̑-Proteobacteria)            | Polyhydroxyalkanoate synthase (AAD10274), <i>Azohydromonas lata</i>                                | 72           | KT944256          |
| 6                        | >11,479  | 67.7           | <i>Leptothrix</i> (̑-Proteobacteria)            | Polyhydroxyalkanoate synthase (AAD10274), <i>Azohydromonas lata</i>                                | 73           | KT944258          |
| 8                        | 34,220   | 67.8           | <i>Leptothrix</i> (̑-Proteobacteria)            | Poly-(R)-hydroxyalkanoic acid synthase (WP_009550222), <i>Burkholderiales bacterium JOSHI_001</i>  | 74           | KT944260          |
| 14                       | 29,565   | 69.1           | <i>Methylibium</i> (̑-Proteobacteria)           | Poly-(R)-hydroxyalkanoic acid synthase (WP_009550222), <i>Burkholderiales bacterium JOSHI_001</i>  | 74           | KT944262          |
| 18                       | 37,718   | 69.4           | <i>Rubrivirax</i> (̑-Proteobacteria)            | Hypothetical protein (WP_043458567), <i>Azohydromonas australica</i>                               | 73           | KT944264          |
| 19                       | 25,085   | 68.1           | <i>Leptothrix</i> (̑-Proteobacteria)            | Polyhydroxyalkanoate synthase (AAD10274), <i>Azohydromonas lata</i>                                | 73           | KT944265          |
| 21                       | 33,064   | 69.3           | <i>Gemmatimonas</i> ( <i>Gemmatimonadetes</i> ) | Poly-(R)-hydroxyalkanoic acid synthase (WP_009550222), <i>Burkholderiales bacterium JOSHI_001</i>  | 73           | KT944267          |
| 23                       | 42,865   | 69.6           | <i>Leptothrix</i> (̑-Proteobacteria)            | Poly-(R)-hydroxyalkanoic acid synthase (WP_009550222), <i>Burkholderiales bacterium JOSHI_001</i>  | 74           | KT944268          |
| 25                       | 41,012   | 66.8           | <i>Varivorax</i> (̑-Proteobacteria)             | Poly-(R)-hydroxyalkanoic acid synthase (WP_018902870), <i>Varivorax paradoxus</i>                  | 93           | KT944269          |
| 27                       | 37,156   | 67.0           | <i>Rubrivirax</i> (̑-Proteobacteria)            | Hypothetical protein (WP_043458567), <i>Azohydromonas australica</i>                               | 73           | KT944270          |
| 51                       | 38,794   | 69.9           | <i>Rubrivirax</i> (̑-Proteobacteria)            | Hypothetical protein (WP_043458567), <i>Azohydromonas australica</i>                               | 73           | KT944272          |
| P2N8                     | 22,625   | 66.3           | <i>Xanthomonadaceae</i> (̑-Proteobacteria)      | Poly(3-hydroxyalkanonate) synthase (WP_028465014), <i>Nisaea denitrificans</i>                     | 55           | KT944272          |
| P11N2                    | 40,293   | 58.4           | <i>Janthinobacterium</i> (̑-Proteobacteria)     | Poly(3-hydroxyalkanonate) synthase (WP_041099836), <i>Sulfuritalea hydrogenivorans</i>             | 73           | KT944278          |
| P1N3                     | 32,797   | 68.6           | <i>Varivorax</i> (̑-Proteobacteria)             | Poly(3-hydroxyalkanonate) synthase (WP_028253507), <i>Varivorax</i> sp. URB0020                    | 86           | KT944273          |
| P4N10                    | >2,724   | 64.2           | <i>Leptothrix</i> (̑-Proteobacteria)            | Polyhydroxyalkanonate synthase (AAD10274), <i>Azohydromonas lata</i>                               | 72           | KT944276          |
| P8N7                     | >5,619   | 67.6           | <i>Sphingomonadaceae</i> (̑-Proteobacteria)     | Poly-(R)-hydroalkanoic acid synthase (WP_033922275), <i>Sphingomonas</i> sp. 37zxx                 | 67           | KT944277          |
| <b>Class II</b>          |          |                |                                                 |                                                                                                    |              |                   |
| 16 (PhaC <sub>1a</sub> ) | 33,900   | 66.1           | <i>Methylibium</i> (̑-Proteobacteria)           | PhaC1 synthase (AHL43537), <i>Pseudomonas</i> sp.F15                                               | 48           | KT944263          |
| 50 (PhaC <sub>1a</sub> ) | 22,965   | 67.0           | <i>Hydrocarboniphaga</i> (̑-Proteobacteria)     | Polyhydroxyalkanoic acid synthase (WP_007929265), <i>Pseudomonas</i> sp. GM17                      | 46           | KT944271          |
| 1 (PhaC <sub>1c</sub> )  | 42,747   | 60.0           | <i>Pseudomonas</i> (̑-Proteobacteria)           | Poly(R)-hydroxyalkanoic acid synthase (WP_033055349), <i>Pseudomonas mandelii</i>                  | 98           | KT944254          |
| 2                        | 59,765   | 59.1           | <i>Pseudomonas</i> (̑-Proteobacteria)           | Poly(R)-hydroxyalkanoic acid synthase (WP_033055349), <i>Pseudomonas mandelii</i>                  | 98           | KU729001          |
| 15                       | 59,765   | 59.1           | <i>Pseudomonas</i> (̑-Proteobacteria)           | Poly(R)-hydroxyalkanoic acid synthase (WP_033055349), <i>Pseudomonas mandelii</i>                  | 98           | KU728996          |
| 5                        | 37473    | 66.3           | <i>Burkholderia</i> (̑-Proteobacteria)          | Poly-beta-hydroxybutyrate polymerase (WP_051556988), <i>Geodermatophilaceae bacterium URHB0062</i> | 53           | KT944257          |
| 7                        | >407     | 65.6           | <i>Pseudomonadaceae</i> (̑-Proteobacteria)      | Poly(R)-hydroxyalkanoic acid synthase (WP_008439266), <i>Pseudomonas</i> sp. Ag1                   | 100          | KT944259          |
| 10                       | >404     | 63.9           | <i>Pseudomonas</i> (̑-Proteobacteria)           | PHA synthase (BAE07114), uncultured bacterium                                                      | 98           | KT944261          |
| 20                       | 30,964   | 66.8           | <i>Salinibacter</i> ( <i>Bacteroidetes</i> )    | Poly(R)-hydroxyalkanoic acid synthase (WP_011354994), <i>Burkholderia lata</i>                     | 59           | KT944266          |
| <b>Unclassified</b>      |          |                |                                                 |                                                                                                    |              |                   |
| P2N10                    | >13,508  | 66.6           | <i>Alcagenaceae</i> (̑-Proteobacteria)          | Poly-R-hydroxyalkanoic acid synthase PhaE (EGV16635), <i>Thiocapsa marina</i> 5811                 | 27           | KT944275          |
|                          |          |                |                                                 | Poly-beta-hydroxybutyrate polymerase PhaC (WP_002708071), <i>Thiothrix nivea</i>                   | 43           | KT944275          |
| 16 (PhaC <sub>2a</sub> ) | 33,900   | 66.1           | <i>Methylibium</i> (̑-Proteobacteria)           | Esterase (WP_043292995), <i>Burkholderia vietnamiensis</i>                                         | 53           | KT944263          |
| 50 (PhaC <sub>2a</sub> ) | 22,965   | 67.0           | <i>Hydrocarboniphaga</i> (̑-Proteobacteria)     | Esterase (WP_043292995), <i>Burkholderia vietnamiensis</i>                                         | 53           | KT944271          |

The PhaC proteins were classified based on their amino acid sequences. Possible origin of cloned metagenomic DNA was predicted by PhyloPythia.

Table 4. Biosynthesis of SCL- and/or -MCL PHAs by 11AW metagenomic clones in *Pseudomonas putida*.

| <i>P. putida</i> | Carbon sources | PHA content (%) | PHA composition (mol%) |      |      |      |      |      |      |
|------------------|----------------|-----------------|------------------------|------|------|------|------|------|------|
|                  |                |                 | 3HB                    | 3HV  | 3HHx | 3HP  | 3HO  | 3HN  | 3HD  |
| Class II         |                |                 |                        |      |      |      |      |      |      |
| PpUW1            | Octanoate      | 30.0            |                        |      | 0.7  |      | 99.3 |      |      |
|                  | Nonanoic acid  | 45.0            |                        |      |      | 19.1 |      | 80.9 |      |
|                  | Gluconic acid  | 1.7             |                        |      |      |      | 21.1 |      | 76.8 |
| PpUW2 (clone 1)  | Octanoate      | 32.7            |                        |      | 4.5  |      | 95.5 |      |      |
|                  | Nonanoic acid  | 23.4            |                        |      |      | 42.0 |      | 58.1 |      |
|                  | Gluconic acid  | 8.2             |                        |      |      |      | 20.4 |      | 79.6 |
| PpUW2 (clone 16) | Octanoate      | 25.1            | 17.3                   |      | 39.3 |      | 43.2 |      |      |
|                  | Nonanoic acid  | 46.5            | 3.4                    | 40.9 |      | 55.4 |      |      |      |
|                  | Gluconic acid  | 4.5             |                        |      | 47.6 |      | 52.4 |      |      |
| PpUW2 (pJC123)   | Octanoate      | 17.5            | 13.9                   |      | 30.3 |      | 51.3 |      |      |
| PpUW2 (pJC157)   | Octanoate      | 32.5            | 14.5                   |      | 33.9 |      | 49.3 |      |      |
| PpUW2 (clone 20) | Octanoate      | 17.6            |                        |      | 17.3 |      | 82.7 |      |      |
|                  | Nonanoic acid  | 45.0            |                        | 7.5  |      | 50.2 |      | 42.3 |      |
|                  | Gluconic acid  | 3.9             |                        |      | 9.9  |      | 37.4 |      | 52.7 |
| Class I          |                |                 |                        |      |      |      |      |      |      |
| PpUW2 (clone 14) | Octanoate      | 41.8            | 98.9                   |      | 1.1  |      |      |      |      |
|                  | Nonanoic acid  | 59.4            | 6.8                    | 93.2 |      |      |      |      |      |
|                  | Gluconic acid  | 81.2            | 97.9                   |      | 0.8  |      | 1.3  |      |      |
| PpUW2 (clone 18) | Octanoate      | 6.4             | 97.9                   |      | 0.5  |      | 2.4  |      |      |
|                  | Nonanoic acid  | 17.3            | 32.8                   | 67.2 |      |      |      |      |      |
|                  | Gluconic acid  | 30.7            | 100.0                  |      |      |      |      |      |      |
| PpUW2 (clone 19) | Octanoate      | 30.9            | 98.8                   |      | 0.5  |      | 0.7  |      |      |
|                  | Nonanoic acid  | 38.1            | 20.9                   | 79.2 |      |      |      |      |      |
|                  | Gluconic acid  | 12.3            | 100.0                  |      |      |      |      |      |      |
| PpUW2 (PhaC25)   | Octanoate      | 15.6            | 95.0                   |      | 2.9  |      | 2.1  |      |      |
|                  | Nonanoic acid  | 43.1            | 25.2                   | 74.9 |      |      |      |      |      |
|                  | Gluconic acid  | 4.1             | 100.0                  |      |      |      |      |      |      |

*P. putida* PpUW1 (PHA<sup>+</sup>) and PpUW2 (PHA<sup>-</sup>) carrying PHA<sup>+</sup> cosmids of 11AW metagenomic clones were grown at 30°C for 48 h in 0.1N M63 media supplemented with 0.5% octanoate, 0.5% nonanoic acid or 1% gluconic acid. PHA content was represented as relative to cell dry weight. Values were the averages of triplicate cultures. The standard deviations were <10% of the values. Abbreviations: 3HB, 3-hydroxybutyrate (C4); 3HHx, 3-hydroxyhexanoate (C6); 3HO, 3-hydroxyoctanoate (C8); 3HD, 3-hydroxydecanoate (C10).

## Supplementary figures

Supplementary 1. The *pha* gene locus in 11AW metagenomic DNA clones encoding PHA synthases (PhaC) were classified based on the PhaC protein sequences.

Supplementary 2. Transposon Tn4652 in 11AW PHA<sup>+</sup> clones 2 and 15. Insertion of the Tn4652 into the *orf17* of clone 1 resulted in clone 2. Clone 15 was derived from clone 1 by the transposon insertion into the *orf19*.

Supplementary 3. Multiple sequence alignment of PHA synthases of 11AW metagenomic DNA clones. Alignment was performed with MUSCLE. The conserved amino acid residues affecting substrate specificity in Class I and II PhaC are highlighted in purple and yellow respectively. The positions of amino acids essential for PhaC activity are highlighted in green. The position of amino acid residues are marked based on PhaC<sub>16</sub> sequence. Names of Class I PhaC are in regular font, Class II PhaC in bold, and unclassified PhaC underlined. PhaC proteins with partial sequences are marked with a star.

Supplementary 4. R-specific enoyl-CoA hydratases PhaJ. (A) Phylogenetic tree was constructed with MEGA6. The bar represents substitution of amino acid residue. (B) Conserved amino acid Asp<sup>39</sup>, His<sup>44</sup> and Ser<sup>7</sup> required for activity are marked.



## Class I

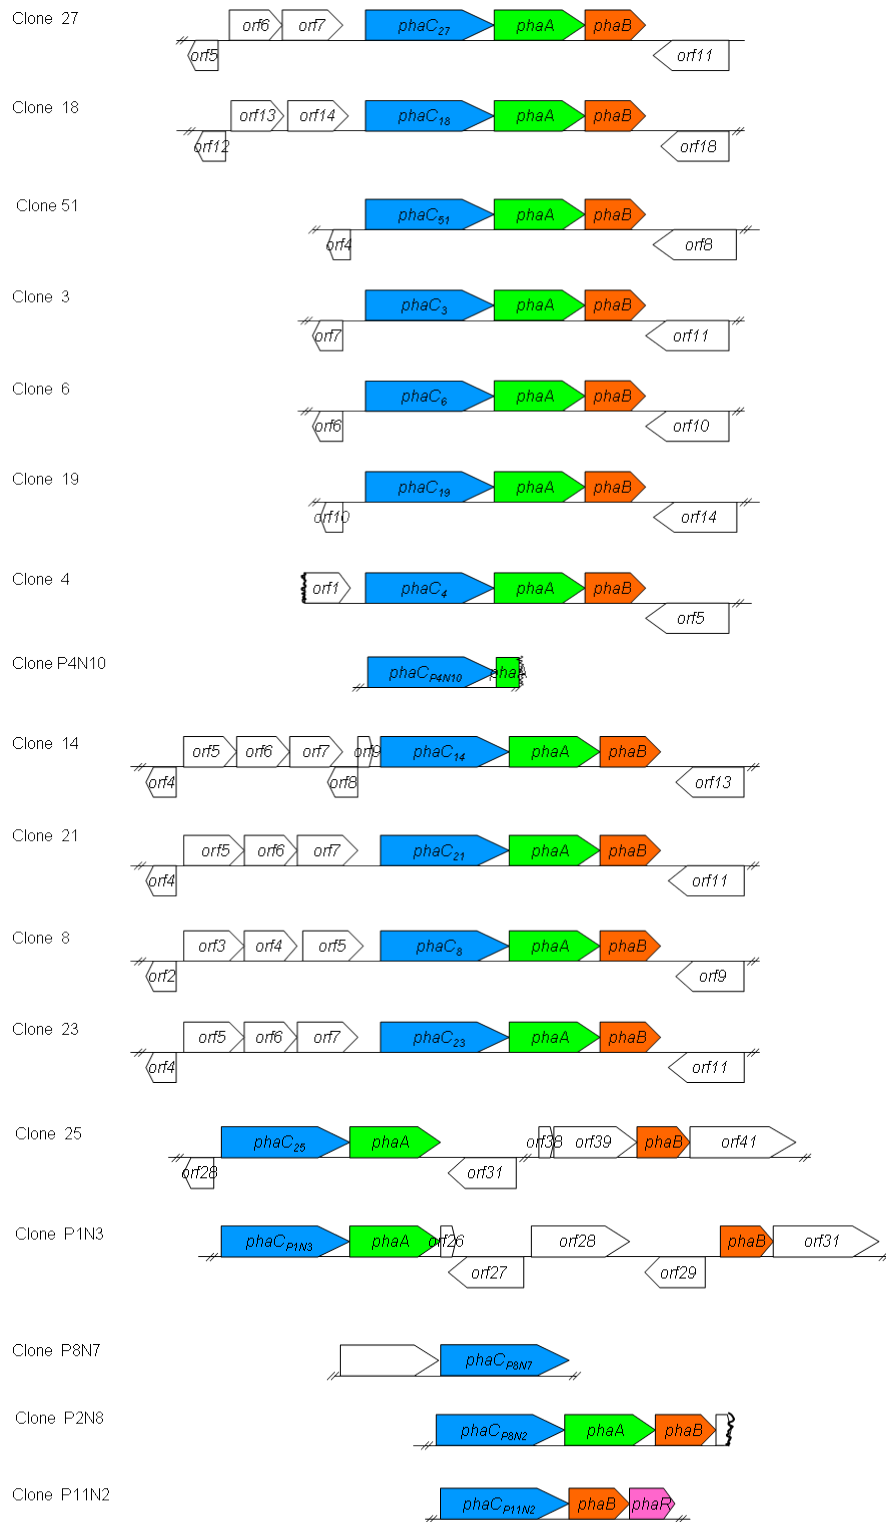

## Class II

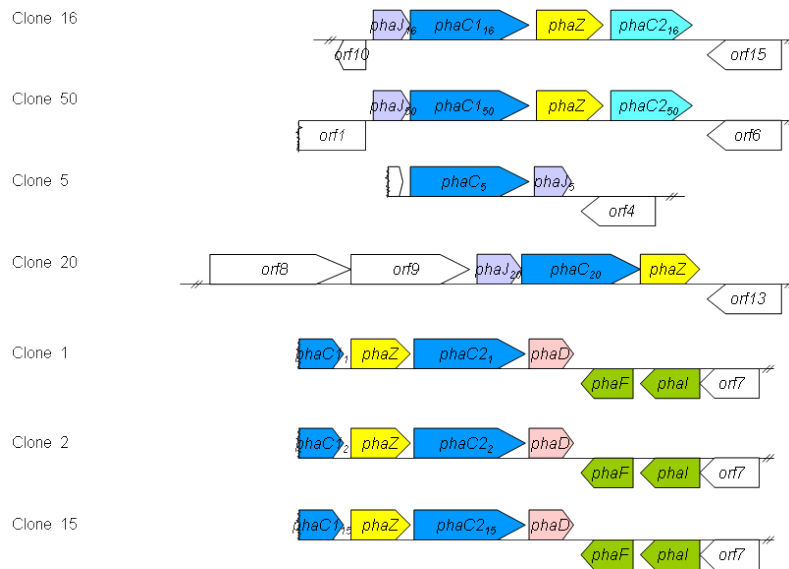

## Unclassified

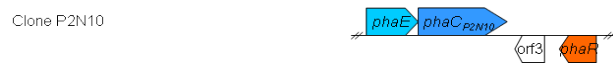

## Supplementary 1.

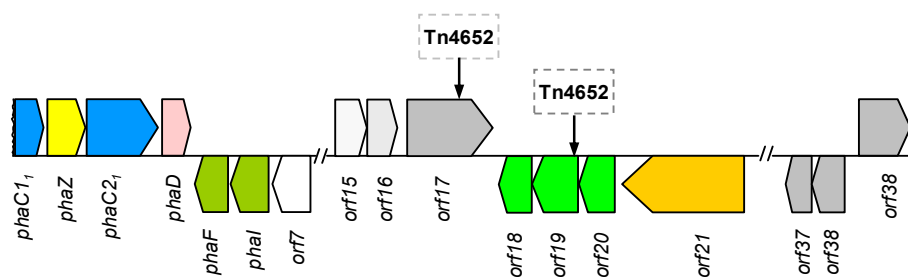

Supplementary 2.

[illegible]

PhaC\_P8N7 Lg--vdsGPrtelvekadrDRRFAApQWreNPlfdMirQsYLLvserLLgsvDsIDGLDp  
PhaC\_P2N8 LgaLgtgqvEpaagPptaptDRRFRAQDwql-PAfdLirQwYLLtsqwlLEqvtgagLDp

**120**

PhaC2<sub>16</sub> qirKkRgtklprdwlrYVraagaIttf-PD-----Rpd--wVt  
PhaC2<sub>50</sub> qirKqRgmrlpldWVsyVreakaIttf-PD-----KpG--wVt  
PhaC\_P2N10\* KaR-----  
PhaC1<sub>16</sub> rdaSaaRFlstmlVeAlaPSNnpltnFvv1KrvrETRgKs1lrGfQHfLsDrldnaGmIS  
PhaC1<sub>50</sub> rdaSaaRFlatmlVeAmAPSNnpltnFvpmqrvrETKGrS1lrGLQHfLsDrldnaGmIS  
PhaC5 rkRrRfLtgiltSAmAPtNtLlignFAA1KKAyETgGKslvrGvQnLIDDVRhnhGmpS  
PhaC20 KgteRaRFvaslmtEAlaPtNFflgNFAA1KrALETgGgS1lrGLanLfdDVatngGmpS  
PhaC10\* -----  
PhaC2<sub>1</sub> ddRARahFAfallnDAMaPSNsL-LNFlA1KeifnsgGnSlvrGisHLvDdlhndG1pr  
PhaC7\* -----  
PhaC\_P11N2 qirKnmRqFlthQa1DAMaPSNFaAtNPEfiKtAlaTeGESIrlGiQnLLgDlEkG--rIS  
PhaC25 KTKARLRFAVEQWmaAsSPSNsLafNaEAQKKAIdTgGESIAkGiQnLLhDVKQG--H1S  
PhaC\_P1N3 KTKARLRFAVEQWVaaSPSNYLafNaEAQKKAIdTgGESIAkGiQnLLhDVKQG--H1S  
PhaC14 KTKARVRFAVQQWVDAMSPaNFMALNPEAQKKALdTKGESVSGiQqLLNDlRkG--aVS  
PhaC8 KTKARVRFAVQQWVDAMSPaNFMALNPEAQKKALdTKGESVAGLQqLfnDlRkG--sVS  
PhaC23 KTKARVRFAVQQWVDAMSPaNFMALNPEAQKKALdTKGESVAGLQqLfnDlRkG--sVS  
PhaC21 KTKARVRFAVQQWVDAMSPaNFMALNPEAQKKALdTKGESVAGLQqLfnDlRkG--sVS  
PhaC4 KTKqRIRFAVQQWVeAaSPSNYLALNPEAQrKALETKGESitQGLIHLwqDVQQG--HVS  
PhaC\_P4N10 KTKqRIRFAVQQWVeAarrSNYvALNPEAQrKALETKGESitQGLIHLwqDVQQG--HVS  
PhaC19 KTKRARIRFAVQQWVDaAsPSPNYLALNPEAQrKALETKGESIAQGLRqLwDDIQQG--HVS  
PhaC6 KTKRARIRFAVQQWVDaAsPSPNYLALNPEAQrKALETKGESIAQGLRqLwDDIQQG--HVS  
PhaC3 KTKRARIRFAVQQWVDaAsPSPNYLALNPEAQrKALETKGESIAQGLRqLwDDIQQG--HVS  
PhaC51 KTKARVRFAVQQWIDaAsPSPNYLafNPEAQrKALETKGESIAQGLaHLlgDIQQG--HVS  
PhaC27 KTKARVRFAVQQWIDaAsPSPNYLafNPEAQrKALETKGESIAQGLaHLlgDIQQG--HVS  
PhaC18 KTKARVRFAVQQWIDaAsPSPNYLafNPEAQrKALETKGESIAQGLaHLlgDIQQG--HVS  
PhaC\_P8N7 KqRekLRfmrtnfVDAMaPSNFaAtNPEv1rAtvEsgGqnllhGfRHvLEDMrGgGrTd  
PhaC\_P2N8 aTRhkLaFytrQfaDALSPSNFvAtNPEv1rAtvEsgGqnllhGfRHvLEDMrGgGrTd

PhaC2<sub>16</sub> -----pntiayEsqtmLlrnfdsdpvvsadtiPviidaPfaghPstIa  
PhaC2<sub>50</sub> -----phtiaFETqtmwLrdfsadApadaiPvivaPyaghPstIa  
PhaC\_P2N10\* -----LLcYpsLrepa-aRPLlLVyslvNr-ihvL  
PhaC1<sub>16</sub> --mvDrtaFEVGRNVaaTpGdVVFREvleLLqYKpqsAeVyEiPLmvVPPqINK--YYvL  
PhaC1<sub>50</sub> --mvDrtPFEVGRNVAcTpGdVVFREvceVlqYKpQTaeVysiPLvvVPPqINK--fYvL  
PhaC5 --QvkrSdFkVGeNlAaTpGAVVlrTErleLLqYqPtTAKVyaiPtLiIPPPIGK-hYfi  
PhaC20 --QvDkSaFrVGeNlAaTpGAVVFRNEvleiqYAPagAqVygRPLlLVPPqINK--YYvi  
PhaC10\* -----  
PhaC2<sub>1</sub> --QvtkqaFEVGktVATTtGsVVFRENELleLiqYKPMseKqysKPLlLVPPqINK--YYif  
PhaC7\* -----  
PhaC\_P11N2 --mTDEaaFEiGRNlAvTsGsVVFENELELQliqYaPLTpKVaaRPLviVPPCINK--fYIL  
PhaC25 --mTDESaFEVGRNVATTEGAVVFENELFQLLEYKPLTPKVYERPFllVPPCINK--YYIL  
PhaC\_P1N3 --mTDESaFEVGRNVATTEGAVVFENELFQLLEYKPLTAKVYERPLlLVPPCINK--fYIL  
PhaC14 --QTDetVFEVGRNVATsEGAVVFENELFQLiEYKPLTgKIHTRPMLFVPPCINK--YYIL  
PhaC8 --QTDsvFEVGRNVATsEGAVVFENELFQLiEYKPLTAKVHTRPMLFVPPCINK--fYIL  
PhaC23 --QTDsvFEVGRNVATsEGAVVFENELFQLiEYKPLTAKVHTRPMLFVPPCINK--fYIL  
PhaC21 --QTDsvFEVGRNVATsvGAVVFENELFQLiEYKPLTAKVHTRPMLFVPPCINK--fYIL  
PhaC4 --QTDsvFEVGRNVATTEGAVVFENELFQLiEYKPLTdkVHETpFLFVPPCINK--YYIL  
PhaC\_P4N10 --QTDsvFEVGRNVATTEGAVVFENELFQLiEYKPLTdkVHETpFLFVPPCINK--YYIL  
PhaC19 --QTDsvFEVGRNVATsEGAVVFENELFQLLEYKPLTAqVHERPMLFIppCINK--YYIL  
PhaC6 --QTDsvFEVGRNVATsEGAVVFENELFQLLEYKPLTAqVHERPMLFIppCINK--YYIL  
PhaC3 --QTDsvFEVGRNVATsEGAVVFENELFQLLEYKPLTAqVHERPMLFIppCINK--YYIL  
PhaC51 --QTDsvFEVGRNVATTEGAVVFENELFQLLEYKPLTAqVHERPMLFVPPCINK--YYIL  
PhaC27 --QTDsvFEVGRNVATTEGAVVFENELFQLLEYKPLTAqVHERPMLFVPPCINK--YYIL  
PhaC18 --QTDsvFEVGRNVATTEGAVVFENELFQLLEYKPLTAqVHERPMLFVPPCINK--YYIL  
PhaC\_P8N7 --hTDpeaFEVGRNiAvTpGkVVkrtpLYeLiqYsPtTetVygtpLVvifPPwINr-fYIL  
PhaC\_P2N8 prmTDpnaFEVGaNiAaTpGkVVFGqLmQLiqYtPvTdqVyrRPLlLVPPwINK-fYvm

**229**

PhaC2<sub>16</sub> DyadggSLvqtlkagGCKRvYVtdWksatheMrnfgidKylsDld---QaIdAVgGRA-  
PhaC2<sub>50</sub> DyadggSLvqtlkagGCKRlyVtdWksathaMrnfgidKylad--LR--daVdhVgGRA-  
PhaC\_P2N10\* DLaRghfIerlqglG-HpVyVldwgrPDaSDaGlsIaDYVcgylstAVRLVrrhgcaR-  
PhaC1<sub>16</sub> DLsPgNsfnvYaVKQG-fqVFmVSWRNPgpeLAhls1DhYlr-GleeAhnaVmeITGak-  
PhaC1<sub>50</sub> DLsPgNsfnvYaVKQG-fqVFmVSWRNPgpeLAyls1qhYlQ-aledAhRaVmeITGad-  
PhaC5 DLsPgRsfveYaVakG-fqVFcISWRNPqveqgdwgiDDYI-gsmLeAVdaVckITGSK-  
PhaC20 DLsPgKsLveYaVasG-iqfFaVSWRNPtvaerdwgleYl1-alseAidaVceITGSE-  
PhaC10\* -----FmVSWRNPtkaqrewglstYIE-alkeAVdVVsAITGSK-  
PhaC2<sub>1</sub> DLsPhNlfvqfalKnG-lqtFmISWRNPdvrhrewglssYVE-aveeAmnVcrAITGaR-  
PhaC7\* -----VFVVSWRNPdvrhrewglstYVa-aleeAlnVtrAITGaR-  
PhaC\_P11N2 DLQPENS1vRyAveQG-ntVFmVSWRNVqadLghlTWDDYIEqGaLKAIRVaQqIcrvp-  
PhaC25 DLQPENS1IRYanEQG-HRVFVVSWRNPDeSLAnaTWDDYIEnaaIKAIhtVQdISGSK-  
PhaC\_P1N3 DLQPENS1IRYAVEQG-HRTFVVSWRNPdaSmsqyTWDDYIEDaaIKAIQVtreITGQdk-  
PhaC14 DLQPENS1IRYTVEQG-HRVFVmSWRNPDeSLAayTWDDYIEkGpIKAIeVVQqIGSQK-  
PhaC8 DLQPENS1IRYTVEQG-HRVFVmSWRNPDeSLAhfTWDDYIEkGpLKAIEVVQqIGGQK-  
PhaC23 DLQPENS1IRYTVEQG-HRVFVmSWRNPDeSLAhfTWDDYIEkGpLKAIEVVQqIGGQK-  
PhaC21 DLQPENS1IRYTVEQG-HRVFVmSWRNPDeSLAhfTWDDYIEkGpLKAIEVVQqIGGQK-  
PhaC4 DLQPENS1IRwTVEQG-HR1FVmSWRNPdSVaakTWnDYIEDGtIRAIEvVreITGaE-  
PhaC\_P4N10 DLQPENS1IRwTVEQG-HR1FemSWRNPdSVaakTWnDYIEDGtIRAIEvVreITGaE-  
PhaC19 DLQPENS1IRYTVAQG-HRTFVVSWRNPdpSIAakTWDDYIDBgAIRAIRVQAISGQa-

PhaC6 DLQPDNSLIRYTVaQG-HRtFVVSWRNPdSIAakTWDDYIDDDGaIRAIReVQAISGQa-  
PhaC3 DLQPDNSLIRYTVaQG-HRtFVVSWRNPdSIAakTWDDYIDDDGaIRAIReVQAISGQa-  
PhaC51 DLQPDNSLIRwTVgQG-HRtFVVSWRNPdSIAadkTWDDYIEDGaIRAIReVQISISGQK-  
PhaC27 DLQPDNSLIRwTVgQG-HRtFVVSWRNPdSIAadkTWDDYIEDGaIRAIReVQISISGQK-  
PhaC18 DLQPDNSLIRwTVgQG-HRtFVVSWRNPdSIAadkTWDDYIEDGaIRAIReVQISISGQK-  
PhaC\_P8N7 DLnPKKfIRwaVEQG-ltVfVVSWSaDeSLAgTlDDYVlgGqVdAIdtIrellGtpE-  
PhaC\_P2N8 DLQPKNSLvgwwlQQG-ytVfMlSWiNfpgpQLAeksfeDxmiEGpLaAlaIEqacGER-

287 318  
Lipase box  
PhaC2<sub>16</sub> ----hlvGlcqGGwLs----AMhAARfp-gkAvSLvLagapiDthAgh-Gpvtkmaqrt  
PhaC2<sub>50</sub> ----hlvGlcqGGwLst----MLAARyp-dkvvSLvLagapiDthAgD-Gpvtklskrt  
PhaC\_P2N10\* ---tIdlLcicqGGs-LAlcLAsLepRal----nrLvtLvtPvDFh--tpG--DVlaDIA  
PhaC1<sub>16</sub> ---KVsfkGlcagGltSAlALgryAdqGkLdtvntLTlnvTLDDiSgmEktnmgyFLtpe  
PhaC1<sub>50</sub> ---KVNfkiGlcagGltLAlALgryAdqGkLdtvntLTlnvTLDDiAgmEktnmgyFLtpS  
PhaC5 ---KVNisGFCagGimttmLsyaAAvrD-krvnaaafgvmLLDfd--teapigalhsrk  
PhaC20 ---RVNTLaacagGltLmlLsyaAAeGD-rrvnSvTLlvTLDDte--aeGvLgLFasEe  
PhaC10\* ---dINmLlaacsGgitctalLghyaALGE-kkvnaLTLLvsLdtT--ldtqvalFVDEq  
PhaC2<sub>1</sub> ---EVNlMGaGagGltIAalqghLgAkrQLrrvSSaTyLvsLLDsq--mdspatLFaDEq  
PhaC7\* ---EVNlMGaGagGltIAalqghLgAkrQLrrvSSasyLvsLLDsq--idspatLFaDEq  
PhaC\_P11N2 ---QVNALGFCVGGTILssALAVARlRGE-dPvASLTLLTTLDDFS--DsGeigyFVDEA  
PhaC25 ---QVNvLGFVGGTILsTALAVLAARGE-kPASSvTLLTfLDFS--DTGiLDIFVDEp  
PhaC\_P1N3 -kggQdTLFCVGGTILsTALAVLAARGE-QPASSvTLLTTLDDFe--DTGiLDIFIDEg  
PhaC14 ---tfNmLGFVGGTILATALAVLAARGQ-QPAhSLTLLTTLDDfk--hTGvLDVfVDEp  
PhaC8 ---QfNmLGFVGGTILATALAVLAARGE-QPAhSLTLLTTLDDfk--hTGvLDVfVDEp  
PhaC23 ---QfNmLGFVGGTILATALAVLAARGE-QPAhSLTLLTTLDDfk--hTGvLDVfVDEp  
PhaC21 ---EfNmLGFVGGTILsTALAVLAARGE-QPAhSLTLLTTLDDfk--hTGvLDVfVDEp  
PhaC4 ---RlNTLGFVGGTILATALAVLAARGD-QPAASvTLLTaLLDFS--ETGvLDLFIIDEp  
PhaC\_P4N10 ---RlNTLGFVGGTILATALAVLAARGD-QPAASvTLLTaLLDFS--ETGvLDLFIIDEp  
PhaC19 ---tIdTLGFVGGTILtTALAVLAARGE-QPAASLTLLTTLDDFA--DTGvLDIFIDEA  
PhaC6 ---tIdTLGFVGGTILtTALAVLAARGE-QPAASLTLLTTLDDFA--DTGvLDIFIDEA  
PhaC3 ---tIdTLGFVGGTILtTALAVLAARGE-QPAASLTLLTTLDDfg--DTGvLDIFIDEA  
PhaC51 ---QIdvLGFVGGTILATALAVLAARGE-QPAASLTLLTTLDDFS--NTGvLDIFIDEA  
PhaC27 ---QIdvLGFVGGTILATALAVLAARGE-QPAASLTLLTTLDDFS--NTGvLDIFIDEA  
PhaC18 ---QIdvLGFVGGTILATALAVLAARGE-QPAASLTLLTTLDDFS--NTGvLDIFIDEA  
PhaC\_P8N7 ---sVhaIGYCVaTtLAatLALLEARGEadkvASatffTaqvDFS--EaGdLnLFVade  
PhaC\_P2N8 ---EVNNAVYCIIGTLLlStLAymtAvnD-ErikSatTfaSLDDFS--DpGdLgVFIDEA

PhaC2<sub>16</sub> pfnfyrsLVa---mGgGrmRGrfmlggwknmhPdehyWgkyidlfnditnPgqveRARH  
PhaC2<sub>50</sub> plsfyrsMva---mGgGrmRGrfmlggwknmhPdehyWgkyidlfnditnPgqvsRARH  
PhaC\_P2N10\* rVldlpallapd----GnLpGavLAGlFgmLRPlrgVgaarapwldgGaEPekleRlRr  
PhaC1<sub>16</sub> glEtmskrskKE----GvLyChEmAkMfawLRPNdLVWNYwVnNYLmGQKPaafFD----  
PhaC1<sub>50</sub> glEkmskrskQE----GvLyChEmAkMfawLRPNdLVWNYwVnNYLmGKKPaafFD----  
PhaC5 lIqVasrsakK----GThpasalaqVfawmRPNDLVWNYwVnNYLTGQdPPsFD----  
PhaC20 aValaklnswtk----GvLpGEELgrvFawLRPNdLVWNYwVnNYLlGnaPPaFD----  
PhaC10\* tLEaakrshyQa----GvLEGrdMAkvFawmRPNDLiWsfVnNYLlGKEPPaFD----  
PhaC2<sub>1</sub> tLEaakrshyQa----GvLEGrdMAkvFawmRPNDLiWsfVnNYLlGKEPPaFD----  
PhaC7\* tLEaakrshyQa----GvLEGrdMAkvFawmRPNDLiWsfVnNYLlGKEPPaFD----  
PhaC\_P11N2 sVaaREagIG---QG-GLLhGrELATvFSaLRaNDLiWqYVVGNYLKGgKPPaFD----  
PhaC25 mVayREmqLG---kG-GLLpGmDLAsTFsFLRPNDLVWNYVVGNYLKGgEtpPPFD----  
PhaC\_P1N3 fVrfrEmqMn---aG-GLLpGsELAsTFsFLRPNDLVWNYVVGNYLKGgEtpPPFD----  
PhaC14 sVQLREvTIGEQAPnGPaLLKGkELATTFsFLRPNDLVWNYVVGNYLKGgEtpPPFD----  
PhaC8 aVQMREmTLGEQAPnGPaLLKGkELATTFsFLRPNDLVWNYVVGNYLKGgEtpPPFD----  
PhaC23 tVQMREmTLGEQAPnGPaLLKGkELATTFsFLRPNDLVWNYVVGNYLKGgEtpPPFD----  
PhaC21 sVQMREmTIGEQAPnGPaLLKGkELATTFsFLRPNDLVWNYVVGNYLKGgEtpPPFD----  
PhaC4 aVQMREaTIGpQsPnGcGLLKGQELATTFsFLRPNDLVWNYVVGNYLKGgEtpPPFD----  
PhaC\_P4N10 aVQMREaTIGpQsPnGcGLLKGQELATTFsFLRPNDLVWNYVVGNYLKGgEtpPPFD----  
PhaC19 aVQLREmTLGEQAPQGPaLLKGQELATTFsFLRPNDLVWNYVVGNYLKGnKPPFD----  
PhaC6 aVQLREmTLGEQAPQGPaLLKGQELATTFsFLRPNDLVWNYVVGNYLKGnKPPFD----  
PhaC3 aVQLREmTLGEQAPQGPaLLKGQELATTFsFLRPNDLVWNYVVGNYLKGnKPPFD----  
PhaC51 qVQLREaTIGldAPQGPGLLKGQELATTFsFLRPNDLVWNYVVGNYLKGDKPPFD----  
PhaC27 qVQLREaTIGldAPQGPGLLKGQELATTFsFLRPNDLVWNYVVGNYLKGDKPPFD----  
PhaC18 qVQLREaTIGldAPQGPGLLKGQELATTFsFLRPNDLVWNYVVGNYLKGDKPPFD----  
PhaC\_P8N7 tLQLVeqisaDk----GyLdGrymaATfNlLRgrDLiWsfVnNYLmGEdyaPFD----  
PhaC\_P2N8 qIaalegkMa----GaGyLdsadMaTaFnlLRaNDLVWsfVnNYLlGKdPaPFD----

391 445  
PhaC2<sub>16</sub> farYehvvvLPGrMYleavkHlflkNlRlar-GEfvalGERisLksIavPVYllAgadGd  
PhaC2<sub>50</sub> fasYehvvvLPGrLYleavkHlflkNlRlar-GEfvalGERisLksItvPVYllAgadGd  
PhaC\_P2N10\* LvaaggDypdgaGraWlefvtaCYreNrLlk-GtLvldGhtVDLrRlrlPvlnvfaRaDH  
PhaC1<sub>16</sub> vLYWNSDSTRlPaaLHhdfc-dmvakNELngevyqlpdaqVDLsRvDvesfVAgRtDH  
PhaC1<sub>50</sub> vLYWNSDaTrLPaaLHhdfc-ellktNELgrgevyqVedaKVDLrKvDvdsfVAgRtDH  
PhaC5 lLawsvDgTNLPgkLHggfL-difeaNaLpkkGsinlGkplDlesIkvetlVtggttDH  
PhaC20 vLYWNSDttTLParLHgefL-dlflNpfnPdallelGkpiDvanvsodaYVAggttDH  
PhaC10\* -----  
PhaC2<sub>1</sub> iLYWNSDnTrLPaaLHgdLl-dffkhNpLshPGgLeVCGtpiDLqkvNvdsfsvAginDH  
PhaC7\* -----  
PhaC\_P11N2 LLYWNSDSTNLPGFflTMYLRnmYLeNnLRiPGKLamCGvKaDLGhvDmPsfVvAcREDH  
PhaC25 LLYWNSDaTNLPGFfYtMYLRnTYheNkLakPnaLTVCGEKiDLGKIDiPaYIYgSREDH  
PhaC\_P1N3 LLYWNSDaTNLPgPMYCWYLRnTYheNkLavPGaLTVaGegqVDLGRIEAPVYlYgSREDH  
PhaC14 LLYWNSDSTNLPGPMYCWYLRHTYlQNELRqPGKLTVCGEKiDLGaIDAPVYIYgSREDH

```
PhaC8      LLYWNgDSTNLPgPMYCWYLRHTYLTnELRqPGKLTVCGEKiDLGaIDAPVYIYgSREDH
PhaC23     LLYWNgDSTNLPgPMYCWYLRHTYLTnELRqPGKLTVCGEKiDLGaIDAPVYIYgSREDH
PhaC21     LLYWNgDSTNLPgPMYCWYLRHTYLTnELRqPGKLTVCGEKiDLGaIDAPVYIYgSREDH
PhaC4      LLYWNSDSTNLPgPflCWYLRnTYLeNkLkDpGavTVCGEKVDLGaIEAPVYIYsSREDH
PhaC_P4N10 LLYWNSDSTNLPgPflCWYLRnTYLeNkLkDpGavTVCGEKVDLGaIEAPVYIYsSREDH
PhaC19     LLYWNSDSTNLPgPMFCWYLRHTYLTnELRvPGKLVVCGEKVDLGKIkaPVfVYgSREDH
PhaC6      LLYWNSDSTNLPgPMFCWYLRHTYLTnELRvPGKLVVCGEKVDLGKIkaPVfVYgSREDH
PhaC3      LLYWNSDSTNLPgPMFCWYLRHTYLTnELRvPGKLVVCGEKVDLGKIkaPVfVYgSREDH
PhaC51     LLYWNSDSTNLPgPMFCWYLRHTYLTnELRqPGKLTVCgQKVDLGKIkaPVfVYASREDH
PhaC27     LLYWNgDSTNLPgPMFCWYLRHTYLTnELRqPGKLTVCgQKVDLGKIkaPVfVYASREDH
PhaC18     LLYWNgDSTNLPgPMFCWYLRHTYLTnELRqPGKLTVCgQKVDLGKIkaPVfVYASREDH
PhaC_P8N7  LLYWNSDSTNLPakWHRaYLRdFYrdNkLvraGELvVdGtpiDihKvktPtYVqAgREDH
PhaC_P2N8  LLfVNaDaTmPaaMHsfYLRnmYLnNrRePGgiTlaGvpinLsKItvPcyfvAtvEDH
```

473 478

```
PhaC216    IttpdqvfnaenLiGTPKdqiRkeLapGChIglfmgaktlKqg-----
PhaC250    IttpeqvfnalenLvGTPRdqiRkeLapGChIglfmgaktlneq-----
PhaC_P2N10* lVPaaAsqalgRai---gsrrygeLaieGgIvGV-----
PhaC116    ItPWdAcYKSvnLL---gGKsqFVLvnSGHIqtlvcPPgKqKaSyqT--aDvLFeDphEW
PhaC150    ItPWdgcYKSvnLL---gGesqFVLvnSGHIqtlvcPPgKqKaSyqT--gEtLFeDphEW
PhaC5      ItPWkqcYrtTQLL---gGpstFVLsnaGvvaslvNPPggnpKatyWl--gpKpddDpEaW
PhaC20     ItPWktcYatTQLL---tGereFVLsSSGHIqsIvNPPggnpKarflT--NpsfPaDpDDW
PhaC10*    -----
PhaC21     ItPWdAvYrSTlLL---gGerRFVLsnSGHvqsIlnPPsnpKanfve--stKlsgDpraW
PhaC7*     -----
PhaC_P11N2 IVPWrsYrgrRLL---gGKsRFVLGASGHIAGVINPPAKgKrnYwvnggDagkasADEW
PhaC25     IVPiggAYaSTQLL---pGKkrFVmgASGHIAGVINPPAKKKRSHWiRddgKrfPktqaEW
PhaC_P1N3  IVPiggAYaSTQLL---KGKkrFVmgASGHIAGVINPPAKKKRSHWiRadgKLPktqaEW
PhaC14     IVPWHAAYESTtil---ntKrRFVLGASGHIAGVINPaAKnKRSHWv--NDKLFPiADEW
PhaC8      IVPWHAAYESTtil---nsKrRFVLGASGHIAGVINPasKnKRSHWT--NDKLPAADDW
PhaC23     IVPWHAAYESTtil---nsKrRFVLGASGHIAGVINPasKnKRSHWT--NDKLPAADDW
PhaC21     IVPWqAAAYESTtil---nsKrRFVLGASGHIAGVINPasKnKRSHWT--NDKLFPsADDW
PhaC4      IVPWtgAYaStaLL---RGKkrFVLGASGHIAGVINPPAKKKRSHWT--NtttPkDpqrW
PhaC_P4N10 IVPWtgAYaSpaLL---RGKkrFVLGASGHIAGVINPPAKKKRSHWT--NtttPkDpqrW
PhaC19     IVPWqAAfESTKIm---KGKvRFVLGASGHIAGVINPPAaKKRSHWv--dgKLgatAqQW
PhaC6      IVPWqAAfESTKIm---KGKvRFVLGASGHIAGVINPPAaKKRSHWv--dgKLgatAqQW
PhaC3      IVPWqAAfESTKIm---KGKvRFVLGASGHIAGVINPPAaKKRSHWv--dgKLgatAqQW
PhaC51     IVPWqAAfESTKiL---KGKvRFVLGASGHIAGVINPPAaKKRSHWv--ggKVvggDaqQW
PhaC27     IVPWdAAfESTKiL---KGKvRFVLGASGHIAGVINPPAaKKRSHWv--ggKVvggDaqQW
PhaC18     IVPWdAAfESTKiL---KGKvRFVLGASGHIAGVINPPAaKKRSHWv--ggKVvggDaqQW
PhaC_P8N7 IaPaasvWkiThyf---QGplRFVLagSGHIAGVINPPeAQkyqyWT--NDgkaetlDQf
PhaC_P2N8  IaPwrsvYagaRLp---gGktRFVLsgSGHIAGIINPPAahKyqHWT--cDsLftspDEW
```

```
PhaC216    -----WariSAWivqgAa-----
PhaC250    -----WariSAWivqgg-----
PhaC_P2N10* -----fAGR-----hglaiVpPaisRflTAtsiKKpr
PhaC116    LehsKattGSWWemWikWaserhGpkkPA--PKApGs-arfpSlgaAPGeYVrA-----
PhaC150    LeqsKptiGSWWdlvWkWasqrsGakrPA--PKApGs-akfppIgaAPGdYVrt-----
PhaC5      LqeAtkhtGtWwvWvdWagkrsGRqkLA--PKAlGN-atYKARekAPGTYYmerA-----
PhaC20     aAgAtphtGSWWehWtdWLatrsGerkaA--PKSlGs-ERHqplaaAPGTYYvhg-----
PhaC10*    -----
PhaC21     yydAKQvdGSWWTqWlgWiQersGaLket--hmAlGN-QnYppmEaAPGTYYrvr-----
PhaC7*     -----
PhaC_P11N2 LeTAsEvsGSWWplWAeWlGgfgGKkVtA--rrrlGs-adfSplEPAPGRYVKaKA-----
PhaC25     LAGAtEqPGSWWTDWAqWLKghAGKqVPA--PKAYGdGKKYKAIEPAPGRYVKaAr-----
PhaC_P1N3  LAGAtEhPGSWWTDWsnWLKtHAGKqIPA--PKSYGkGsaYKAIEsAPGRYVKaAr-----
PhaC14     fvSAtErPGSWWpDWSAWLKaqgGaMIaA--PKgYGN-KtfKAIEPAPGRYVKqKA-----
PhaC8      MASAIekPGSWWSDWSAWLKtqgGpMVaA--PKgYGN-KKlKAIEPAPGRYVKqKA-----
PhaC23     MAGAIekPGSWWSDWSAWLKtqgGpMVaA--PKgYGN-KmlKAIEPAPGRYVKqKA-----
PhaC21     MASAtEkPGSWWSDWSAWLKtqgGpMVaA--PKgYGN-KKlKAIEPAPGRYVKqKA-----
PhaC4      LAGAtEsPGSWWTDWAawlApplsGKeIaA--PKAlGs-RKYKSIEPAPGRYVKqKA-----
PhaC_P4N10 LAGAtEsPGSWWTDWAawlApplsGKeIaA--PKAlGs-RKYKSIEPAPGRYVKqKA-----
PhaC19     LdSAKEvPGSWWTDWSAWLKpHAGKqVPA--PKtYGN-KsHKvIEPAPGRYVKAKA-----
PhaC6      LdSAKEvPGSWWTDWSAWLKpHAGKqVPA--PKtYGN-KsHKvIEPAPGRYVKAKA-----
PhaC3      LdSAKEvPGSWWTDWSAWLKpHAGKqVPA--PKtYGN-KsHKvIEPAPGRYVKAKA-----
PhaC51     LeSAKdvPGSWWSDWAawlKpHAGKMVPA--PKAYGd-RsHKAIEaAPGRYVKAKA-----
PhaC27     LeSAKdvPGSWWSDWAawlKpHAGKMVPA--PKAYGd-RsHKAIEaAPGRYVKAKA-----
PhaC18     LeSAKdvPGSWWSDWAawlKpHAGKMVPA--PKAYGd-RsHKAIEaAPGRYVKAKA-----
PhaC_P8N7 vAgAtEhkGSWWpDWieWigaqdGKRvPAkgarvpGk-gKlKaIEaAPGSYVKAr-----
PhaC_P2N8  qAgAahaGSWWpDWkfWlGrrAGgkVMA---rtpGs-ggltaIEdAPGSYVrmtshQE--
```

## Supplementary 3



A.

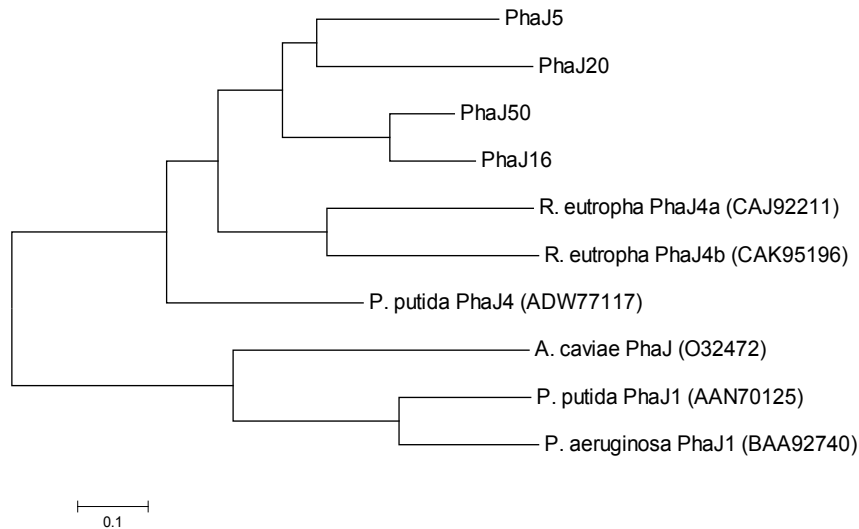

B.

|                     | 39                                                            | 44 |
|---------------------|---------------------------------------------------------------|----|
| R. eutropha PhaJ4a  | -MrtiaSLeeLEglqGOEvavSDWIEvtQqqvngFAdaTGDhQWIIHIDVERAkKESPyGG |    |
| R. eutropha PhaJ4b  | -MktyeNiadLQplVGevIGtSEWLaLDQARintFAdaTGDhQWIIHIDVERAkN-gPFGa |    |
| P. putida PhaJ4     | --mphvpvteLSqyVGkELGhSEWLKIDQqRinlFAeaTGDfQfIHVDpEKAak-tPFGG  |    |
| PhaJ20              | mteEaySvrtIpqfaGrELGvSDWLRIDQeRIdrFAACTdDrQWIIHIDVERAeRESPFgt |    |
| PhaJ50              | --mstlkMatLtekVGQELGttrWvalDQSRiQaFAdCTGDqQWIIHIDVERAkKESPFGG |    |
| PhaJ16              | --msaltMqnIaakIGeELGvtgWttLDQARIQaFAdCTGDqQWIIHIDVERArKESPFGG |    |
| PhaJ5               | -MadaltLatIEsfVGELGeSqWvRmDQqRidaFAeCTGDrQWIIHIDVERAAREgPFGG  |    |
| A. caviae PhaJ      | -----MsaqsleVGQkarlSk--RfgaAevaaFAalseDfnplHLDpafAAt-taFer    |    |
| P. putida PhaJ1     | -MsQvtNtpyealeVGQkaeykk--sVEerdIqlFAAmsGDhnpvHLDaEfAAK-SmFre  |    |
| P. aeruginosa PhaJ1 | -MsQvqNipyaeleVGQkaeyts--sIaerdIqlFAAvsGDrnpvHLDaayAAt-tqFke  |    |
|                     | 71                                                            |    |
| R. eutropha PhaJ4a  | PIAHGfLTLSLLPfkfmbNalhmPskI--GVNYGLnRVRfTAPVpVGSklRaRIKLLkver |    |
| R. eutropha PhaJ4b  | PIAHGfLTLSLLPafthsayriRns-stGVNYGLDKVRFPAPVpVdSllRaqfKLMSyea  |    |
| P. putida PhaJ4     | tIAHGfLTLSLLPfkliEDilvlpqgkMvVNYGLDsVRfiqPVKvdsrVRlkVKLGevve  |    |
| PhaJ20              | tvAHGLlvLSLLPfrfgfEVglvPpgVssalNYGfDgVRfVSPVKAgaRVrdRVtLLeatd |    |
| PhaJ50              | PvAHGMLTSLLEPmwlfDLpaaPddagailNYGfDKVRFlAPVKSgAKVRaRIKLLAatP  |    |
| PhaJ16              | PvAHGMLTSLLEPwlfELpaaPldagailNYGfDKVRFlAPVKAgsrVRgRIKLLAaaP   |    |
| PhaJ5               | tIAHGfLTLSiigpaqlDVwiaPagiTgtavhYGLDKVRFlAPVpaGrnVRtRIKLLAvea |    |
| A. caviae PhaJ      | PIvHGML-LSLfsgllgqqlpgkgsIyLG-----qslsFklPVfVGdeVtaeVevtAlre  |    |
| P. putida PhaJ1     | rIAHGmfsgaLisaaavactlpgPgtIyLG-----qQmsFqkPVKIGdtltvRleiLeklP |    |
| P. aeruginosa PhaJ1 | rIAHGMLsgaLisaaiaTvlpgPgtIyLG-----qtlRftrPVKLGddlkvelevLeklP  |    |
| R. eutropha PhaJ4a  | ldplpkspelvgqaqstwevTVEREGsdrPvcVAEsIttryg-----               |    |
| R. eutropha PhaJ4b  | len-----GgaqFkvemmVERQGgSKPvcIAEsILrrfP-----                  |    |
| P. putida PhaJ4     | Kkp-----GqwLlkaiaTlEIEGEeKPAyIAEsLsLcfv-----                  |    |
| PhaJ20              | KgE-----GrLlvkarhTIEIEGESKPAIvAEMLaMlItg-----                 |    |
| PhaJ50              | KeK-----GrvLlTqeyTVEIEnEtKPAIAELlVmlIPkaa-----                |    |
| PhaJ16              | KdK-----GrLlTqeyTVEIEnEtKPAIAELlVmlvPka-----                  |    |
| PhaJ5               | Kgs-----GrLlTtenvVEIEGHdKPAIAAtaLaMiMP-----                   |    |
| A. caviae PhaJ      | dkp---iatLlTrIFTgggalaVtGE-----VVkLP-----                     |    |
| P. putida PhaJ1     | KfK-----vRiatnVYnqndelvVaGEAeilaprkkqtVeLvspPnfvas            |    |
| P. aeruginosa PhaJ1 | KnR-----vRmatrVFngagkqvVDGEAeimapeEkLsVeLaelPpisig            |    |

## Supplementary 4
